# Supplementary material for: Citrus fruits as a treasure trove of active natural metabolites that potentially provide benefits for human health
Source: PubMed Central journal article supplement (PMC4690266; doi:10.1186/s13065-015-0145-9), 2015-12-24
Supplement: 13065_2015_145_MOESM1_ESM.pdf [file 13065_2015_145_MOESM1_ESM.pdf]

**Additional file 1 Flavonoids isolated from *Citrus* species.**

| compounds                                      | Structure                                                                         | source                                                                                                                                                                                                                                                                                                                                                                                                                                                                                                                                | ref.                      |
|------------------------------------------------|-----------------------------------------------------------------------------------|---------------------------------------------------------------------------------------------------------------------------------------------------------------------------------------------------------------------------------------------------------------------------------------------------------------------------------------------------------------------------------------------------------------------------------------------------------------------------------------------------------------------------------------|---------------------------|
| <i>flavanone and flavanonol</i>                | 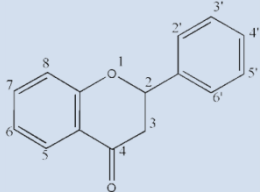 |                                                                                                                                                                                                                                                                                                                                                                                                                                                                                                                                       |                           |
| naringenin                                     | 5-OH, 4'-OH, 7-OH                                                                 | CJ <sup>a</sup> ; CJ <sup>b</sup> ; CG <sup>a</sup> ; CG <sup>b</sup>                                                                                                                                                                                                                                                                                                                                                                                                                                                                 | [1]                       |
| hesperetin                                     | 5-OH, 3'-OH, 4'-OH, 7-OCH <sub>3</sub>                                            | CJ <sup>a</sup> ; CJ <sup>b</sup> ; CAF <sup>d</sup>                                                                                                                                                                                                                                                                                                                                                                                                                                                                                  | [1, 2]                    |
| narirutin                                      | 5-OH, 4'-OH, 7-O-rut.                                                             | CSI <sup>a</sup> ; CSI <sup>b</sup> ; CU <sup>a</sup> ; CU <sup>b</sup> ; CLI <sup>b</sup> ; CP <sup>b</sup> ; CSU <sup>b</sup> ; CR <sup>a</sup> ; CR <sup>b</sup> ; CCL <sup>a</sup> ; CAT <sup>d</sup>                                                                                                                                                                                                                                                                                                                             | [3, 4, 5, 6, 7]           |
| naringin                                       | 5-OH, 4'-OH, 7-O-neo.                                                             | CAT <sup>a</sup> ; CAT <sup>d</sup> ; CJ <sup>a</sup> ; CJ <sup>b</sup> ; CU <sup>a</sup> ; CU <sup>b</sup> ; CG <sup>a</sup> ; CG <sup>b</sup> ; CG <sup>e</sup> ; CP <sup>b</sup> ; CR <sup>d</sup> ; CAT <sup>a</sup>                                                                                                                                                                                                                                                                                                              | [3, 5, 8, 9, 10]          |
| naringenin-7-O-rutinoside-4'-O-glucoside       | 5-OH, 7-O-rut., 4'-O-glu.                                                         | CSI <sup>b</sup> ; CR <sup>b</sup> ; CU <sup>b</sup> ; CP <sup>b</sup> ; CAT <sup>d</sup>                                                                                                                                                                                                                                                                                                                                                                                                                                             | [3, 5]                    |
| naringenin-7-O-neohesperidoside-4'-O-glucoside | 5-OH, 7-O-neo., 4'-O-glu.                                                         | CP <sup>b</sup>                                                                                                                                                                                                                                                                                                                                                                                                                                                                                                                       | [3, 5]                    |
| naringin dehydrated hexoside                   | 5-OH, 4'-O-dih., 7-O-neo.                                                         | CAT <sup>a</sup>                                                                                                                                                                                                                                                                                                                                                                                                                                                                                                                      | [11]                      |
| hesperidin                                     | 5-OH, 3'-OH, 4'-OCH <sub>3</sub> , 7-O-rut.                                       | CR <sup>a</sup> ; CR <sup>b</sup> ; CR <sup>d</sup> ; CCL <sup>a</sup> ; CU <sup>a</sup> ; CU <sup>b</sup> ; CSI <sup>a</sup> ; CSI <sup>b</sup> ; CLI <sup>b</sup> ; CP <sup>b</sup> ; CSU <sup>a</sup> ; CSU <sup>b</sup> ; CMI <sup>a</sup> ; CMI <sup>b</sup> ; CME <sup>a</sup> ; CME <sup>b</sup> ; CHY <sup>a</sup> ; CHY <sup>b</sup> ; CLE <sup>a</sup> ; CAT <sup>a</sup> ; CAT <sup>d</sup> ; CE <sup>a</sup> ; CJ <sup>a</sup> ; CJ <sup>b</sup> ; CG <sup>a</sup> ; CG <sup>b</sup> ; CG <sup>e</sup> ; CAF <sup>d</sup> | [1, 2, 3, 4, 6, 7, 8, 10] |
| neohesperidin                                  | 5-OH, 3'-OH, 4'-OCH <sub>3</sub> , 7-O-neo.                                       | CP <sup>b</sup> ; CMI <sup>a</sup> ; CMI <sup>b</sup> ; CME <sup>a</sup> ; CME <sup>b</sup> ; CHY <sup>a</sup> ; CHY <sup>b</sup> ; CJ <sup>b</sup> ; CU <sup>a</sup> ; CU <sup>b</sup> ; CG <sup>a</sup> ; CG <sup>b</sup> ; CG <sup>e</sup> ; CAT <sup>d</sup> ; CAT <sup>a</sup>                                                                                                                                                                                                                                                   | [1, 3, 5, 9, 10]          |
| hesperidin dehydrated hexoside                 | 5-OH, 4'-OCH <sub>3</sub> , 3'-dih., 7-O-rut.                                     | CAT <sup>a</sup>                                                                                                                                                                                                                                                                                                                                                                                                                                                                                                                      | [8]                       |
| eriocitrin                                     | 5-OH, 3'-OH, 4'-OH, 7-O-rut.                                                      | CSI <sup>b</sup> ; CR <sup>b</sup> ; CU <sup>b</sup> ; CLI <sup>b</sup> ; CME <sup>a</sup> ; CME <sup>b</sup> ; CHY <sup>b</sup> ; CAT <sup>d</sup>                                                                                                                                                                                                                                                                                                                                                                                   | [3, 5, 10]                |
| neoeriocitrin                                  | 5-OH, 3'-OH, 4'-OH, 7-neo.                                                        | CHY <sup>b</sup> ; CAT <sup>d</sup> ; CAT <sup>a</sup>                                                                                                                                                                                                                                                                                                                                                                                                                                                                                | [5, 9, 10]                |

|                                                                                   |                                                             |                                                                                                                                                                                                                            |                |
|-----------------------------------------------------------------------------------|-------------------------------------------------------------|----------------------------------------------------------------------------------------------------------------------------------------------------------------------------------------------------------------------------|----------------|
| eriodictyol-7-O-rutinoside-4'-O-glucoside                                         | 5-OH, 3'-OH, 4'-O-glu., 7-O-rut.                            | CLI <sup>b</sup>                                                                                                                                                                                                           | [3]            |
| didymin                                                                           | 5-OH, 4'-OCH <sub>3</sub> , 7-O-rut.                        | CSI <sup>a</sup> ; CSI <sup>b</sup> ; CU <sup>a</sup> ; CU <sup>b</sup> ; CLI <sup>b</sup> ; CP <sup>b</sup> CSU <sup>a</sup> ; CSU <sup>b</sup> ; CR <sup>a</sup> ; CR <sup>b</sup> ; CCL <sup>a</sup> ; CAF <sup>d</sup> | [3, 6, 10, 12] |
| poncirin                                                                          | 5-OH, 4'-OCH <sub>3</sub> , 7-O-neo.                        | CP <sup>b</sup> ; CAT <sup>a</sup> ; CR <sup>a</sup> ; CR <sup>b</sup>                                                                                                                                                     | [3, 11, 13]    |
| <i>flavone and flavonol</i>                                                       |                                                             |                                                                                                                                                                                                                            |                |
| 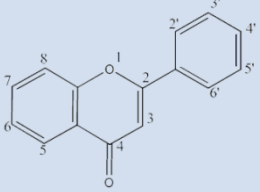 |                                                             |                                                                                                                                                                                                                            |                |
| luteolin                                                                          | 5-OH, 4'-OH, 5'-OH, 7-OH                                    | CJ <sup>a</sup> ; CJ <sup>b</sup> ; CU <sup>a</sup> ; CU <sup>b</sup> ; CG <sup>a</sup> ; CG <sup>b</sup>                                                                                                                  | [1]            |
| apigenin                                                                          | 5-OH, 4'-OH, 7-OH                                           | CAT <sup>d</sup>                                                                                                                                                                                                           | [10]           |
| quercetin                                                                         | 3-OH, 5-OH, 7-OH, 4'-OH, 5'-OH                              | CR <sup>d</sup> ; CAT <sup>d</sup>                                                                                                                                                                                         | [10]           |
| luteolin-7-O -rutinoside                                                          | 5-OH, 4'-OH, 5'-OH, 7-O-rut.                                | CR <sup>b</sup> ; CU <sup>b</sup> ; CLI <sup>b</sup>                                                                                                                                                                       | [3]            |
| luteolin-7-O-neohesperidoside                                                     | 5-OH, 4'-OH, 5'-OH, 7-O- neo.                               | CAT <sup>a</sup>                                                                                                                                                                                                           | [9]            |
| luteolin-6,8-di-C -glucoside                                                      | 5-OH, 4'-OH, 5'-OH, 7-OH, 6-C-glu., 8-C-glu.                | CSI <sup>b</sup> ; CLI <sup>b</sup> ; CAT <sup>d</sup>                                                                                                                                                                     | [3, 5]         |
| luteolin-7-O-neohesperidopode-4'-O-glucoside                                      | 5-OH, 4'-O-glu.e, 5'-OH, 7-O-neo.                           | CP <sup>b</sup>                                                                                                                                                                                                            | [3]            |
| apigenin-7-O -rutinoside                                                          | 5-OH, 4'-OH, 7-O-rut.                                       | CR <sup>b</sup> ; CU <sup>b</sup> ; CLI <sup>b</sup>                                                                                                                                                                       | [3]            |
| apigenin-7-O-neohesperidoside                                                     | 5-OH, 4'-OH, 7-O-neo.                                       | CP <sup>b</sup> ; CAT <sup>d</sup>                                                                                                                                                                                         | [3, 5]         |
| apigenin-6,8-di-C-glucoside                                                       | 5-OH, 4'-OH, 7-OH, 6-C-glu., 8-C-glu.                       | CSI <sup>b</sup> ; CR <sup>b</sup> ; CU <sup>b</sup> ; CLI <sup>b</sup> ; CP <sup>b</sup> ; CSU <sup>a</sup> ; CSU <sup>b</sup> ; CMI <sup>b</sup> ; CAT <sup>d</sup> ; CAT <sup>a</sup>                                   | [3, 4, 5, 9]   |
| apigenin-8-C-glucosyl-2''-O-rhamnoside                                            | 5-OH, 4'-OH, 7-OH, 8-C-glu., -2''-O-rha.                    | CMI <sup>a</sup> ; CMI <sup>b</sup>                                                                                                                                                                                        | [4]            |
| apigenin-7-O-rutinoside-4'-O-glucoside                                            | 5-OH; 4'- O-glu., 7-O -rut.                                 | CLI <sup>b</sup>                                                                                                                                                                                                           | [3]            |
| apigenin-7-O-neohesperidoside-4'-glucoside                                        | 5-OH, 4'-O-glu., 7-O- neo.                                  | CAT <sup>a</sup>                                                                                                                                                                                                           | [9]            |
| chrysoeriol-7-O-rutinoside                                                        | 5-OH, 4'-OH, 5'-OCH <sub>3</sub> , 7-O-rut.                 | CR <sup>b</sup> ; CU <sup>b</sup> ; CLI <sup>b</sup>                                                                                                                                                                       | [3]            |
| chrysoeriol-6,8-di-C-glucoside                                                    | 5-OH, 4'-OH, 5'-OCH <sub>3</sub> , 7-OH, 6-C-glu., 8-C-glu. | CLI <sup>b</sup> ; CSU <sup>a</sup>                                                                                                                                                                                        | [3, 4]         |

|                              |                                                                |                                                                                                                                                                       |             |
|------------------------------|----------------------------------------------------------------|-----------------------------------------------------------------------------------------------------------------------------------------------------------------------|-------------|
| diosmin                      | 5-OH, 3'-OH, 4'-OCH <sub>3</sub> , 7-O-rut.                    | CR <sup>b</sup> ; CU <sup>a</sup> ; CU <sup>b</sup> ; CLI <sup>b</sup> ; CME <sup>a</sup> ; CME <sup>b</sup> ; CHY <sup>a</sup> ; CCL <sup>a</sup> ; CSI <sup>a</sup> | [3, 4, 6]   |
| diosmetin-8-C -glucoside     | 5-OH, 3'-OH, 4'-OCH <sub>3</sub> , 7-OH, 8-C-glu.              | CR <sup>b</sup> ; CU <sup>b</sup> ; CLI <sup>b</sup>                                                                                                                  | [3]         |
| diosmetin-6- C-glucoside     | 5-OH, 3'-OH, 4'-OCH <sub>3</sub> , 7-OH, 6-C-glu.              | CR <sup>b</sup> ; CU <sup>b</sup> ; CLI <sup>b</sup> ; CME <sup>b</sup>                                                                                               | [3, 4]      |
| diosmetin-6,8-di-C-glucoside | 5-OH, 3'-OH, 4'-OCH <sub>3</sub> , 7-OH, 6-C-glu.,<br>8-C-glu. | CR <sup>b</sup> ; CU <sup>b</sup> ; CLI <sup>b</sup> ; CSU <sup>a</sup> ; CME <sup>a</sup> ; CME <sup>b</sup> ; CAT <sup>a</sup>                                      | [3, 4, 9]   |
| rutin                        | 3-O-rut., 5-OH, 7-OH, 4'-OH, 5'-OH                             | CSI <sup>b</sup> ; CR <sup>b</sup> ; CR <sup>d</sup> ; CU <sup>b</sup> ; CLI <sup>b</sup> ; CAT <sup>d</sup> ; CAF <sup>d</sup>                                       | [3, 10, 12] |
| quercetin-7-O -rutinoside    | 3-OH, 5-OH, 7-O-rut., 4'-OH, 5'-OH                             | CSI <sup>b</sup> ; CR <sup>b</sup> ; CU <sup>b</sup> ; CLI <sup>b</sup> ; CP <sup>b</sup>                                                                             | [3]         |
| isorhamnetin-3-O-rutinoside  | 5-OH, 3-O-rut., 7-OH, 4'-OH, 5'-OCH <sub>3</sub>               | CSI <sup>b</sup> ; CR <sup>b</sup> ; CU <sup>b</sup> ; CLI <sup>b</sup>                                                                                               | [3]         |
| isorhamnetin-7-O-rutinoside  | 5-OH, 3-OH, 7-O-rut, 4'-OH, 5'-OCH <sub>3</sub>                | CSI <sup>b</sup> ; CLI <sup>b</sup>                                                                                                                                   | [3]         |
| tamarixetin-7-O -rutinoside  | 3-OH, 5-OH, 4'-OCH <sub>3</sub> , 5-OH, 7-O -rut.              | CR <sup>b</sup> ; CU <sup>b</sup>                                                                                                                                     | [3]         |
| kaempferol-3-O -rutinoside   | 5-OH, 3-O-rut., 7-OH, 4'-OH                                    | CSI <sup>b</sup> ; CR <sup>b</sup> ; CU <sup>b</sup>                                                                                                                  | [3]         |
| kaempferol                   | 5-OH, 3-O-glu., 7-O-glu. 4'-OH                                 | CAT <sup>d</sup>                                                                                                                                                      | [10]        |

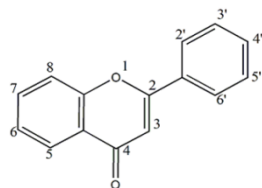

*Polymethoxylated flavones*

|                                     |                                                                                                                                  |                                                                                                                                                                                                                                                                                        |                   |
|-------------------------------------|----------------------------------------------------------------------------------------------------------------------------------|----------------------------------------------------------------------------------------------------------------------------------------------------------------------------------------------------------------------------------------------------------------------------------------|-------------------|
| sinensetin                          | 5-OCH <sub>3</sub> , 6-OCH <sub>3</sub> , 7-OCH <sub>3</sub> , 4'-OCH <sub>3</sub> ,<br>5'-OCH <sub>3</sub>                      | CAT <sup>a</sup> ; CE <sup>a</sup> ; CCL <sup>a</sup> ; CU <sup>a</sup> ; CSI <sup>a</sup> ; CR <sup>a</sup> ; CR <sup>b</sup> ; CLM <sup>a</sup> ; CSI <sup>a</sup> ; CTR <sup>a</sup> ;<br>CU <sup>a</sup> ; CK <sup>a</sup> ; CTB <sup>a</sup>                                      | [6, 7, 11, 14]    |
| isosinensetin                       | 3'-OCH <sub>3</sub> , 4'-OCH <sub>3</sub> , 5-OCH <sub>3</sub> , 7-OCH <sub>3</sub> ,<br>8-OCH <sub>3</sub>                      | CLE <sup>a</sup> ; CE <sup>a</sup>                                                                                                                                                                                                                                                     | [11]              |
| nobiletin                           | 3'-OCH <sub>3</sub> , 4'-OCH <sub>3</sub> , 3-OCH <sub>3</sub> , 5-OCH <sub>3</sub> ,<br>6-OCH <sub>3</sub> , 7-OCH <sub>3</sub> | CLE <sup>a</sup> ; CAT <sup>a</sup> ; CE <sup>a</sup> ; CCL <sup>a</sup> ; CU <sup>a</sup> ; CSI <sup>a</sup> ; CR <sup>a</sup> ; CR <sup>d</sup> ; CP <sup>a</sup> ; CP <sup>c</sup> ; CHA <sup>a</sup> ;<br>CSI <sup>a</sup> ; CTR <sup>a</sup> ; CK <sup>a</sup> ; CTB <sup>a</sup> | [6, 7, 9, 11, 14] |
| tangeretin                          | 5-OH, 6-OCH <sub>3</sub> , 7-OCH <sub>3</sub> , 8-OCH <sub>3</sub> , 4'-OCH <sub>3</sub>                                         | CLE <sup>a</sup> ; CAT <sup>a</sup> ; CE <sup>a</sup> ; CCL <sup>a</sup> ; CU <sup>a</sup> ; CSI <sup>a</sup> ; CR <sup>a</sup> ; CR <sup>b</sup> ; CHA <sup>a</sup> ; CSI <sup>a</sup> ;<br>CTR <sup>a</sup> ; CU <sup>a</sup> ; CK <sup>a</sup> ; CTB <sup>a</sup> ;                 | [6, 7, 9, 11, 14] |
| 3,5,6,7,8,3',4'-heptamethoxyflavone | 3-OCH <sub>3</sub> , 5-OCH <sub>3</sub> , 6-OCH <sub>3</sub> , 7-OCH <sub>3</sub> ,                                              | CHA <sup>a</sup> ; CSI <sup>a</sup> ; CTR <sup>a</sup> ; CU <sup>a</sup> ; CK <sup>a</sup> ; CTB <sup>a</sup> ; CLE <sup>a</sup> ; CP <sup>a</sup> ; CP <sup>c</sup>                                                                                                                   | [14]              |

|                                           |                                                                                                                |                                                                                                                                                          |
|-------------------------------------------|----------------------------------------------------------------------------------------------------------------|----------------------------------------------------------------------------------------------------------------------------------------------------------|
|                                           | 8-OCH <sub>3</sub> , 3'-OCH <sub>3</sub> , 4'-OCH <sub>3</sub>                                                 |                                                                                                                                                          |
| 5-hydroxy-6,7,8,3',4'-pentamethoxyflavone | 5-OH, 6-OCH <sub>3</sub> , 7-OCH <sub>3</sub> , 8-OCH <sub>3</sub> , 3'-OCH <sub>3</sub> , 4'-OCH <sub>3</sub> | CLM <sup>a</sup> ; CHA <sup>a</sup> ; CCA <sup>a</sup> ; CSI <sup>a</sup> ; CU <sup>a</sup> ; CK <sup>a</sup> ; CTB <sup>a</sup> ; CLE <sup>a</sup> [14] |
| 5,7,8,3',4'-pentamethoxyflavone           | 5-OCH <sub>3</sub> , 7-OCH <sub>3</sub> , 8-OCH <sub>3</sub> , 3'-OCH <sub>3</sub> , 4'-OCH <sub>3</sub>       | CSI <sup>a</sup> ; CTR <sup>a</sup> ; CU <sup>a</sup> ; CK <sup>a</sup> ; CTB <sup>a</sup> ; CLE <sup>a</sup> [14]                                       |

dih: dihydratedhexoside; glu: glucoside; glul: glucosyl; rha: rhamnoside; rut: rutinoside; neo: neohesperidoside; <sup>a</sup>: peel; <sup>b</sup>: pulp; <sup>c</sup>: pressed oil; <sup>d</sup>: juice; <sup>e</sup>: whole fruit.; CAF: *C. aurantifolia*; CAT: *C. aurantium*; CCA: *C. canaliculata*; CCL: *C. clementina*; CE: *C. erythrosa*; CG: *C. grandis*; CHA: *C. hassaku*; CHY: *C. hystrix*; CJ: *C. junos*; CK: *C. kinokuni*; CLE: *C. leiocarpa*; CLI: *C. limon*; CLM: *C. limonimeditica*; CME: *C. medica*; CMI: *C. microcarpa*; CP: *C. paradisi*; CR: *C. reticulata*; CSI: *C. sinensis*; CSU: *C. suhuiensis*; CTB: *C. tachibana*; CTR: *C. tamurana*; CU: *C. unshiu*.

1. Yoo KM, Hwang IK, Park JH, Moon B: **Major Phytochemical Composition of 3 Native Korean Citrus Varieties and Bioactive Activity on V79 - 4 Cells Induced by Oxidative Stress.** *J Food Sci* 2009, **74**: C462-C468.
2. Patil JR, Chidambara Murthy K, Jayaprakasha G, Chetti MB, Patil BS: **Bioactive compounds from Mexican lime (*Citrus aurantifolia*) juice induce apoptosis in human pancreatic cells.** *J Agric Food Chem* 2009, **57**: 10933-10942.
3. Abad-Garcia B, Berrueta LA, Garmon-Lobato S, Urkaregi A, Gallo B, Vicente F: **Chemometric characterization of fruit juices from Spanish cultivars according to their phenolic compound contents: I. Citrus fruits.** *J Agric Food Chem* 2012, **60**: 3635-3644.
4. Roowi S, Crozier A: **Flavonoids in tropical citrus species.** *J Agric Food Chem* 2011, **59**: 12217-12225.
5. Barreca D, Bellocco E, Caristi C, Leuzzi U, Gattuso G: **Distribution of C- and O-glycosyl flavonoids,(3-hydroxy-3-methylglutaryl) glycosyl flavanones and**

- furocoumarins in Citrus aurantium L juice.** *Food Chem* 2011, **124**: 576-582.
6. Bermejo A, Llosa MJ, Cano A: **Analysis of bioactive compounds in seven citrus cultivars.** *Food Sci Technol Int* 2011, **17**: 55-62.
7. Stuetz W, Prapamontol T, Hongsibsong S, Biesalski HK: **Polymethoxylated flavones, flavanone glycosides, carotenoids, and antioxidants in different cultivation types of tangerines (Citrus reticulata Blanco cv. Sainampueng) from Northern Thailand.** *J Agric Food Chem* 2010, **58**: 6069-6074.
8. Kim KN, Heo SJ, Yoon WJ, Kang SM, Ahn G, Yi TH, Jeon YJ: **Fucoxanthin inhibits the inflammatory response by suppressing the activation of NF- $\kappa$ B and MAPKs in lipopolysaccharide-induced RAW 264.7 macrophages.** *Eur J Pharmacol* 2010, **649**: 369-375.
9. Mencherini T, Campone L, Piccinelli AL, Mesa MG, Sanchez DM, Aquino RP, Rastrelli L: **HPLC-PDA-MS and NMR characterization of a hydroalcoholic extract of Citrus aurantium L. var. amara peel with antiedematogenic activity.** *J Agric Food Chem* 2013, **61**: 1686-1693.
10. Moulehi I, Bourgou S, Ourghemmi I, Tounsi MS: **Variety and ripening impact on phenolic composition and antioxidant activity of mandarin (Citrus reticulata Blanco) and bitter orange (Citrus aurantium L.) seeds extracts.** *Ind Crop Prod* 2012, **39**: 74-80.
11. Kim HG, Kim GS, Park S, Lee JH, Seo ON, Lee SJ, Kim JH, Shim JH, Abd El-Aty A, Jin JS: **Flavonoid profiling in three citrus varieties native to the Republic of Korea using liquid chromatography coupled with tandem mass spectrometry: contribution to overall antioxidant activity.** *Biomed Chromatogr* 2012, **26**: 464-470.

12. Patil JR, Chidambara Murthy KN, Jayaprakasha GK, Chetti MB, Patil BS: **Bioactive compounds from Mexican lime ( Citrus aurantifolia ) juice induce apoptosis in human pancreatic cells.** *J Agric Food Chem* 2009, **57**: 10933-10942.
13. Zhu X, Luo F, Zheng Y, Zhang J, Huang J, Sun C, Li X, Chen K: **Characterization, purification of poncirin from edible citrus ougan (Citrus reticulate cv. suavissima) and its growth inhibitory effect on human gastric cancer cells SGC-7901.** *Int J Mol Sci* 2013, **14**:8684-8697.
14. Hirata T, Fujii M, Akita K, Yanaka N, Ogawa K, Kuroyanagi M, Hongo D: **Identification and physiological evaluation of the components from Citrus fruits as potential drugs for anti-corpulence and anticancer.** *Bioorgan Med Chem* 2009, **17**: 25-28.
