# Supplementary material for: Citrus fruits as a treasure trove of active natural metabolites that potentially provide benefits for human health
Source: PubMed Central journal article supplement (PMC4690266; doi:10.1186/s13065-015-0145-9), 2015-12-24
Supplement: 13065_2015_145_MOESM2_ESM.pdf [file 13065_2015_145_MOESM2_ESM.pdf]

**Additional file 2 Alkaloids, coumarins, limonoids, carotenoids and phenolic acids isolated from *Citrus* species.**

| <b>Compounds</b>                    | <b>source</b>                                                                                                                                                                                                                                                      | <b>ref.</b>         |
|-------------------------------------|--------------------------------------------------------------------------------------------------------------------------------------------------------------------------------------------------------------------------------------------------------------------|---------------------|
| <i>alkaloids</i>                    |                                                                                                                                                                                                                                                                    |                     |
| (±)octopamine                       | CAT <sup>e</sup> ; CAT <sup>a</sup> ; CR <sup>a</sup>                                                                                                                                                                                                              | [1, 2, 3, 4]        |
| (±)synephrine                       | CAT <sup>e</sup> ; CAT <sup>a</sup> ; CAT <sup>d</sup> ; CR <sup>a</sup> ; CU <sup>a</sup> ; CSI <sup>e</sup> ; CSI <sup>d</sup>                                                                                                                                   | [1, 2, 3, 4, 5]     |
| tyramine                            | CAT <sup>e</sup> ; CR <sup>a</sup>                                                                                                                                                                                                                                 | [2, 3]              |
| N-methyltyramine                    | CAT <sup>e</sup> ; CR <sup>a</sup>                                                                                                                                                                                                                                 | [2, 3]              |
| hordenine                           | CAT <sup>e</sup>                                                                                                                                                                                                                                                   | [2]                 |
| γ-aminobutyric acid                 | CMY <sup>d</sup> ; CP <sup>d</sup> ; CAT <sup>d</sup>                                                                                                                                                                                                              | [6]                 |
| 2-hydroxyethyltrimethyl-lammonium   | CMY <sup>d</sup> ; CP <sup>d</sup> ; CAT <sup>d</sup>                                                                                                                                                                                                              | [6]                 |
| N-methylnicotinic acid              | CMY <sup>d</sup> ; CP <sup>d</sup> ; CAT <sup>d</sup>                                                                                                                                                                                                              | [6]                 |
| L-proline                           | CMY <sup>d</sup> ; CP <sup>d</sup> ; CAT <sup>d</sup>                                                                                                                                                                                                              | [6]                 |
| N-methyl-L-proline                  | CMY <sup>d</sup> ; CP <sup>d</sup> ; CAT <sup>d</sup>                                                                                                                                                                                                              | [6]                 |
| N,N-dimethyl-L-proline              | CMY <sup>d</sup> ; CP <sup>d</sup> ; CAT <sup>d</sup>                                                                                                                                                                                                              | [6]                 |
| 4-hydroxy-L-proline                 | CMY <sup>d</sup> ; CP <sup>d</sup> ; CAT <sup>d</sup>                                                                                                                                                                                                              | [6]                 |
| 4-hydroxy-L-prolinebetaine          | CMY <sup>d</sup> ; CP <sup>d</sup> ; CAT <sup>d</sup>                                                                                                                                                                                                              | [6]                 |
| tryptophan                          | CB <sup>a</sup> ; CB <sup>b</sup> ; CB <sup>f</sup>                                                                                                                                                                                                                | [7]                 |
| tryptamine                          | CB <sup>f</sup>                                                                                                                                                                                                                                                    | [7]                 |
| N-methyltryptamine                  | CB <sup>b</sup>                                                                                                                                                                                                                                                    | [7]                 |
| N,N-dimethyltryptamine              | CB <sup>a</sup> ; CB <sup>b</sup>                                                                                                                                                                                                                                  | [7]                 |
| N,N,N-triethyltryptamine            | CB <sup>a</sup> ; CB <sup>b</sup> ; CB <sup>f</sup>                                                                                                                                                                                                                | [7]                 |
| 5-hydroxytryptamine                 | CB <sup>f</sup>                                                                                                                                                                                                                                                    | [8]                 |
| 5-hydroxy-N-methyltryptamine        | CB <sup>b</sup> ; CB <sup>f</sup>                                                                                                                                                                                                                                  | [8]                 |
| 5-hydroxy-N,N-dimethyltryptamine    | CB <sup>a</sup> ; CB <sup>b</sup> ; CB <sup>f</sup>                                                                                                                                                                                                                | [8]                 |
| 5-hydroxy-N,N,N-trimethyltryptamine | CB <sup>a</sup> ; CB <sup>b</sup> ; CB <sup>f</sup>                                                                                                                                                                                                                | [8]                 |
| <i>coumarins</i>                    |                                                                                                                                                                                                                                                                    |                     |
| pranferin                           | CP <sup>a</sup> ; CP <sup>c</sup>                                                                                                                                                                                                                                  | [9]                 |
| meranzin                            | CP <sup>a</sup> ; CP <sup>c</sup> ; CAT <sup>c</sup>                                                                                                                                                                                                               | [9, 10, 11]         |
| isomeranzin                         | CP <sup>c</sup> ; CG <sup>e</sup> ; CAT <sup>c</sup> ; CAT <sup>a</sup>                                                                                                                                                                                            | [10, 11, 12]        |
| meranzin hydrate                    | CAT <sup>e</sup> ; CAT <sup>a</sup> ; CP <sup>c</sup>                                                                                                                                                                                                              | [11, 12, 13]        |
| auraptene                           | CP <sup>a</sup> ; CP <sup>c</sup> ; CP <sup>e</sup> ; CAT <sup>e</sup> ; CMA <sup>a</sup> ; CAF <sup>e</sup> ; CB <sup>e</sup> ; CSI <sup>e</sup> ; CR <sup>e</sup> ; CLI <sup>e</sup> ; CLI <sup>a</sup> ; CLM <sup>a</sup> ; CHA <sup>a</sup> ; CCA <sup>a</sup> | [9, 13, 14, 15, 16] |
| ecxyaurapten                        | CP <sup>a</sup> ; CMA <sup>a</sup>                                                                                                                                                                                                                                 | [15]                |
| osthol                              | CP <sup>a</sup> ; CP <sup>c</sup> ; CMA <sup>a</sup> ; CG <sup>e</sup>                                                                                                                                                                                             | [9, 11, 15, 17]     |
| marmin                              | CP <sup>a</sup> ; CP <sup>c</sup> ; CAT <sup>e</sup>                                                                                                                                                                                                               | [9, 13]             |
| limettin                            | CSI <sup>a</sup> ; CLI <sup>a</sup> ; CLI <sup>c</sup> ; CP <sup>a</sup> ; CP <sup>d</sup> ; CB <sup>a</sup> ; CB <sup>c</sup> ; CMA <sup>a</sup> ; CCL <sup>a</sup> ; CAF <sup>a</sup> ; CAF <sup>c</sup> ; CAF <sup>d</sup> ; CAF <sup>e</sup>                   | [10, 15, 18]        |
| 5-geranyloxy-7-methoxycoumarin      | CLI <sup>a</sup> ; CLI <sup>c</sup> ; CP <sup>a</sup> ; CAF <sup>c</sup> ; CAF <sup>e</sup> ; CB <sup>c</sup>                                                                                                                                                      | [10, 11, 15, 18]    |
| 5-isoantenyloxy-7-methoxy-coumarin  | CLI <sup>c</sup>                                                                                                                                                                                                                                                   | [11]                |
| ecxybergamottin hydrate             | CP <sup>c</sup>                                                                                                                                                                                                                                                    | [11]                |
| 8-geranyloxypsoralen                | CLI <sup>a</sup> ; CLI <sup>c</sup> ; CAF <sup>c</sup>                                                                                                                                                                                                             | [10, 15]            |
| umbelliferone                       | CP <sup>e</sup> ; CAF <sup>e</sup> ; CB <sup>e</sup> ; CAT <sup>e</sup> ; CSI <sup>e</sup> ; CR <sup>e</sup> ; CLI <sup>e</sup>                                                                                                                                    | [16]                |
| herniarin                           | CAF <sup>c</sup>                                                                                                                                                                                                                                                   | [10]                |

|                             |                                                                                                                                                                       |                             |
|-----------------------------|-----------------------------------------------------------------------------------------------------------------------------------------------------------------------|-----------------------------|
| oxyaucedanin                | CCL <sup>a</sup> ; CLI <sup>a</sup> ; CLI <sup>c</sup> ; CAF <sup>c</sup>                                                                                             | [10, 11, 15]                |
| oxyaucedanin hydrate        | CLI <sup>a</sup> ; CLI <sup>c</sup> ; CAF <sup>c</sup>                                                                                                                | [10, 15]                    |
| psoralen                    | CB <sup>a</sup>                                                                                                                                                       | [15]                        |
| isopimpinellin              | CCL <sup>a</sup> ; CLI <sup>c</sup> ; CAF <sup>c</sup> ; CAF <sup>d</sup> ; CAF <sup>a</sup> ; CAF <sup>e</sup>                                                       | [10, 11, 15, 18, 19]        |
| byakangelicin               | CCL <sup>a</sup>                                                                                                                                                      | [10]                        |
| byakangelicol               | CCL <sup>a</sup> ; CLI <sup>c</sup> ; CAF <sup>c</sup>                                                                                                                | [10, 15]                    |
| imaratorin                  | CLI <sup>c</sup> ; CAF <sup>c</sup>                                                                                                                                   | [10]                        |
| iscmaratorin                | CLI <sup>c</sup> ; CAF <sup>c</sup>                                                                                                                                   | [10]                        |
| cnidilin                    | CLI <sup>c</sup> ; CAF <sup>c</sup>                                                                                                                                   | [10]                        |
| cnidicin                    | CLI <sup>c</sup> ; CAF <sup>c</sup>                                                                                                                                   | [10]                        |
| bergapten                   | CP <sup>a</sup> ; CP <sup>c</sup> ; CCL <sup>a</sup> ; CB <sup>a</sup> ; CB <sup>c</sup> ; CMA <sup>a</sup> ; CAF <sup>c</sup> ; CAT <sup>c</sup> ; CG <sup>e</sup>   | [9, 10, 15, 20]             |
| 5-hydroxyfurocoumarin       | CG <sup>e</sup>                                                                                                                                                       | [20]                        |
| bergamottin                 | CLI <sup>a</sup> ; CLI <sup>c</sup> ; CP <sup>a</sup> ; CP <sup>d</sup> ; CB <sup>a</sup> ; CMA <sup>a</sup> ; CAF <sup>c</sup> ; CAF <sup>d</sup> ; CAF <sup>a</sup> | [10, 11, 15, 19]            |
| ecxybergamottin             | CP <sup>a</sup> ; CP <sup>c</sup> ; CMA <sup>a</sup> ; CAT <sup>c</sup> ; CAT <sup>d</sup>                                                                            | [10, 15, 21]                |
| 6',7'-dihydroxybergamottin  | CP <sup>a</sup> ; CP <sup>c</sup> ; CMA <sup>a</sup> ; CCA <sup>a</sup> ; CK <sup>a</sup> ; CTB <sup>a</sup> ; CLE <sup>a</sup>                                       | [9, 14, 15]                 |
| <b><i>limonoids</i></b>     |                                                                                                                                                                       |                             |
| limonin                     | CG <sup>e</sup> ; CR <sup>f</sup> ; CR <sup>e</sup> ; CMA <sup>e</sup> ; CAT <sup>e</sup> ; CAT <sup>f</sup> ; CAF <sup>d</sup> ; CJ <sup>f</sup>                     | [3, 22, 23, 24, 25, 26, 27] |
| nomilin                     | CG <sup>e</sup> ; CR <sup>f</sup> ; CR <sup>e</sup> ; CMA <sup>e</sup> ; CAT <sup>e</sup> ; CJ <sup>f</sup> ; CAT <sup>f</sup>                                        | [3, 23, 24, 25, 26, 27]     |
| obacunone                   | CR <sup>f</sup> ; CJ <sup>f</sup> ; CAT <sup>f</sup>                                                                                                                  | [25, 26, 27]                |
| obacunone acetate           | CAT <sup>f</sup>                                                                                                                                                      | [27]                        |
| deacetyl-nomilin            | CAT <sup>e</sup> ; CAT <sup>f</sup>                                                                                                                                   | [24, 27]                    |
| citriolide-A                | CR <sup>f</sup>                                                                                                                                                       | [26]                        |
| deoxylimonin                | CAT <sup>f</sup>                                                                                                                                                      | [27]                        |
| methyldeacetylnomilinate    | CAT <sup>f</sup>                                                                                                                                                      | [27]                        |
| ichangin                    | CAT <sup>e</sup> ; CAT <sup>f</sup>                                                                                                                                   | [24, 27]                    |
| ichangensin                 | CAT <sup>f</sup>                                                                                                                                                      | [27]                        |
| limonexic acid              | CAF <sup>d</sup> ; CLI <sup>f</sup>                                                                                                                                   | [22,25]                     |
| isolimonexic acid           | CAT <sup>e</sup> ; CAF <sup>d</sup> ; CLI <sup>f</sup>                                                                                                                | [22, 24, 25]                |
| calamin                     | CAT <sup>f</sup>                                                                                                                                                      | [27]                        |
| limonin glucoside           | CMA <sup>e</sup> ; CR <sup>e</sup> ; CAT <sup>e</sup> ; CAF <sup>d</sup> ; CLI <sup>f</sup> ; CSI <sup>e</sup>                                                        | [22, 23, 24, 25, 28]        |
| nomilin glucoside           | CSI <sup>e</sup>                                                                                                                                                      | [28]                        |
| obacunone glucoside         | CMA <sup>e</sup> ; CR <sup>e</sup> ; CR <sup>f</sup> ; CAT <sup>e</sup> ; CAT <sup>f</sup> ; CLI <sup>f</sup> ; CSI <sup>e</sup>                                      | [23, 24, 25, 27, 28]        |
| deacetyl nomilin glucoside  | CMA <sup>e</sup> ; CR <sup>e</sup> ; CAT <sup>e</sup> ; CLI <sup>f</sup> ; CSI <sup>e</sup>                                                                           | [23, 24, 25, 28]            |
| nomilinic acid glucoside    | CMA <sup>e</sup> ; CR <sup>e</sup> ; CAT <sup>e</sup> ; CLI <sup>f</sup> ; CSI <sup>e</sup>                                                                           | [23, 24, 25, 28]            |
| deacetyl nomilinic acid     | CSI <sup>e</sup>                                                                                                                                                      | [28]                        |
| isoobacunone acid glucoside | CAT <sup>e</sup>                                                                                                                                                      | [24]                        |
| obacunone acid glucoside    | CAT <sup>f</sup>                                                                                                                                                      | [27]                        |
| calamin glucoside           | CAT <sup>f</sup>                                                                                                                                                      | [27]                        |
| <b><i>carotenoids</i></b>   |                                                                                                                                                                       |                             |
| violaxanthin                | CCL <sup>a</sup> ; CCL <sup>b</sup> ; CU <sup>a</sup> ; CSI <sup>a</sup>                                                                                              | [29, 30, 31, 32]            |
| β-crytoxanthin              | CCL <sup>a</sup> ; CCL <sup>b</sup> ; CU <sup>a</sup> ; CSI <sup>a</sup>                                                                                              | [29, 30, 31, 32]            |

|                             |                                                                                                                                                                                         |                                  |
|-----------------------------|-----------------------------------------------------------------------------------------------------------------------------------------------------------------------------------------|----------------------------------|
| carotene                    | CCL <sup>a</sup> ; CCL <sup>b</sup> ; CU <sup>a</sup> ; CSI <sup>a</sup>                                                                                                                | [29, 31, 32]                     |
| lutein                      | CCL <sup>b</sup> ; CSI <sup>a</sup>                                                                                                                                                     | [31, 32]                         |
| zeaxanthin                  | CCL <sup>b</sup> ; CSI <sup>a</sup>                                                                                                                                                     | [31, 32]                         |
| antheraxanthin              | CCL <sup>b</sup> ; CSI <sup>a</sup>                                                                                                                                                     | [30, 31]                         |
| cryptoxanthin               | CCL <sup>b</sup> ; CSI <sup>a</sup>                                                                                                                                                     | [31, 32]                         |
| phytoene                    | CCL <sup>b</sup> ; CSI <sup>a</sup>                                                                                                                                                     | [30, 31, 32]                     |
| phytofluene                 | CCL <sup>b</sup> ; CSI <sup>a</sup>                                                                                                                                                     | [30, 31, 32]                     |
| β-citraurin/accarotencd     | CSI <sup>a</sup>                                                                                                                                                                        | [30, 32]                         |
| ζ-Carotene                  | CCL <sup>b</sup>                                                                                                                                                                        | [31]                             |
| neoxanthin                  | CSI <sup>a</sup>                                                                                                                                                                        | [32]                             |
| <b>Phenolic acid</b>        |                                                                                                                                                                                         |                                  |
| sinapic acid                | CU <sup>a</sup> ; CMI <sup>a</sup> ; CP <sup>a</sup> ; CP <sup>b</sup> ; CSI <sup>e</sup>                                                                                               | [33, 34, 35, 36]                 |
| <i>P</i> -coumaric acid     | CAT <sup>d</sup> ; CR <sup>a</sup> ; CSI <sup>a</sup> ; CU <sup>a</sup> ; CMI <sup>a</sup> ; CP <sup>a</sup> ; CP <sup>b</sup> ; CSI <sup>e</sup> ; CAT <sup>a</sup> ; CAT <sup>d</sup> | [33, 34, 35, 36, 37, 38, 39, 40] |
| ferulic acid                | CR <sup>d</sup> ; CR <sup>a</sup> ; CU <sup>a</sup> ; CMI <sup>a</sup> ; CP <sup>a</sup> ; CP <sup>b</sup> ; CSI <sup>e</sup> ; CAT <sup>a</sup> ; CAT <sup>d</sup>                     | [33, 34, 35, 36, 37, 39, 40]     |
| caffeic acid                | CR <sup>d</sup> ; CSI <sup>a</sup> ; CU <sup>a</sup> ; CMI <sup>a</sup> ; CP <sup>a</sup> ; CP <sup>b</sup>                                                                             | [33, 34, 36, 37, 38]             |
| trans-2-hydroxycinnamicacid | CR <sup>d</sup> ; CAT <sup>d</sup> ; CAT <sup>a</sup>                                                                                                                                   | [37, 40]                         |
| trans-cinnamic acid         | CAT <sup>d</sup> ; CAT <sup>a</sup>                                                                                                                                                     | [41]                             |
| rosmarinic acid             | CR <sup>d</sup> ; CAT <sup>d</sup> ; CAT <sup>a</sup>                                                                                                                                   | [37, 41]                         |
| protocatechuic acid         | CU <sup>a</sup> ; CP <sup>a</sup> ; CP <sup>b</sup>                                                                                                                                     | [34, 36]                         |
| <i>P</i> -hydroxybenzcc     | CR <sup>a</sup> ; CU <sup>a</sup> ; CP <sup>a</sup> ; CP <sup>b</sup>                                                                                                                   | [34, 36, 39]                     |
| vanillic acid               | CR <sup>d</sup> ; CR <sup>a</sup> ; CAT <sup>a</sup> ; CAT <sup>d</sup> ; CU <sup>a</sup> ; CP <sup>a</sup> ; CP <sup>b</sup>                                                           | [37, 34, 36, 39, 41]             |
| gallic acid                 | CR <sup>d</sup> ; CR <sup>a</sup> ; CAT <sup>a</sup> ; CAT <sup>d</sup>                                                                                                                 | [37, 39, 41]                     |
| chlorogenic acid            | CR <sup>d</sup> ; CP <sup>a</sup> ; CP <sup>b</sup> ; CAT <sup>a</sup> ; CAT <sup>d</sup>                                                                                               | [37, 36]                         |
| ferulic-O-hexoside          | CSI <sup>b</sup> ; CR <sup>b</sup> ; CU <sup>b</sup> ; CLI <sup>b</sup> ; CP <sup>b</sup>                                                                                               | [42]                             |
| sinapic-O-hexoside          | CSI <sup>b</sup> ; CR <sup>b</sup> ; CU <sup>b</sup> ; CLI <sup>b</sup>                                                                                                                 | [42]                             |
| syringic acid               | CR <sup>d</sup> ; CAT <sup>a</sup> ; CAT <sup>d</sup>                                                                                                                                   | [37, 41]                         |

<sup>a</sup>: peel; <sup>b</sup>: pulp; <sup>c</sup>: pressed oil; <sup>d</sup>: juice; <sup>e</sup>: whole fruit; <sup>f</sup>: seed; CAF: *C. aurantifolia*; CAT: *C. aurantium*; CB: *C. bergamia*; CCA: *C. canaliculata*; CCL: *C. clementina*; CG: *C. grandis*; CHA: *C. hassaku*; CJ: *C. junos*; CK: *C. kinokuni*; CLE: *C. leiocarpa*; CLI: *C. limon*; CLM: *C. limonimeditica*; CMA: *C. maxima*; CMI: *C. microcarpa*; CMY: *C. myrtifolia*; CP: *C. paradisi* peel; CR: *C. reticulata*; CSI: *C. sinensis*; CTB: *C. tachibana*; CU: *C. unshiu*.

1. Nelson BC, Putzbach K, Sharpless KE, Sander LC: **Mass spectrometric determination of the predominant adrenergic protoalkaloids in bitter orange (*Citrus aurantium*)**. *J Agr Food Chem* 2007, **55**: 9769-9775.

2. Percy DW, Adcock JL, Conlan XA, Barnett NW, Gange ME, Noonan LK, Henderson LC, Francis PS: **Determination of *Citrus aurantium* protoalkaloids using HPLC with acidic potassium permanganate chemiluminescence detection**. *Talanta* 2010, **80**: 2191-2195.

3. Pellati F, Benvenuti S: **Fast high-performance liquid chromatography analysis of phenethylamine alkaloids in Citrus natural products on a pentafluorophenylpropyl stationary phase.** *J Chromatogr A* 2007, **1165**: 58-66.
4. Roman MC, Betz JM, Hildreth J: **Determination of synephrine in bitter orange raw materials, extracts, and dietary supplements by liquid chromatography with ultraviolet detection: single-laboratory validation.** *JAOAC Int* 2007, **90**: 68-81.
5. Mattoli L, Cangi F, Maidecchi A, Ghiara C, Tubaro M, Traldi P: **A rapid liquid chromatography electrospray ionization mass spectrometry(n) method for evaluation of synephrine in Citrus aurantium L. samples.** *J Agric Food Chem* 2005, **53**: 9860-9866.
6. Servillo L, Giovane A, Balestrieri ML, Bata-Csere A, Cautela D, Castaldo D: **Betaines in fruits of Citrus genus plants.** *J Agric Food Chem* 2011, **59**: 9410-9416.
7. Servillo L, Giovane A, Balestrieri ML, Cautela D, Castaldo D: **N-methylated tryptamine derivatives in citrus genus plants: identification of N,N,N-trimethyltryptamine in bergamot.** *J Agric Food Chem* 2012, **60**: 9512-9518.
8. Servillo L, Giovane A, Balestrieri ML, Casale R, Cautela D, Castaldo D: **Citrus genus plants contain N-methylated tryptamine derivatives and their 5-hydroxylated forms.** *J Agric Food Chem* 2013, **61**: 5156-5162.
9. Chebrolu KK, Jayaprakasha GK, Jifon J, Patil BS: **Purification of coumarins, including meranzin and pranferin, from grapefruit by solvent partitioning and a hyphenated chromatography.** *Sep Purif Technol* 2013, **116**: 137-144.
10. Dugo P, Piperno A, Romeo R, Cambria M, Russo M, Carnovale C, Mondello L: **Determination of oxygen heterocyclic components in citrus products by HPLC with UV detection.** *J Agric*

*Food Chem* 2009, **57**: 6543-6551.

11. Marina Russo GT, Caterina Camovale, Ivana Bonaccorsi, Luigi Mondello, Paola Dugo: **A new HPLC method developed for the analysis of oxygen heterocyclic compounds in Citrus essential oils.** *J Essent Oil Res* 2012, **24**: 119-129.
12. Mencherini T, Campone L, Piccinelli AL, Mesa MG, Sanchez DM, Aquino RP, Rastrelli L: **HPLC-PDA-MS and NMR characterization of a hydroalcoholic extract of Citrus aurantium L. var. amara peel with antiedematogenic activity.** *J Agric Food Chem* 2013, **61**: 1686-1693.
13. Chen HF, Zhang WG, Yuan JB, Li YG, Yang SL, Yang WL: **Simultaneous quantification of polymethoxylated flavones and coumarins in Fructus aurantii and Fructus aurantii immaturus using HPLC-ESI-MS/MS.** *J Pharmaceut Biomed* 2012, **59**: 90-95.
14. Hirata T, Fujii M, Akita K, Yanaka N, Ogawa K, Kuroyanagi M, Hongo D: **Identification and physiological evaluation of the components from Citrus fruits as potential drugs for anti-corpulence and anticancer.** *Bioorgan Med Chem* 2009 **17**: 25-28.
15. Dugrand A, Olry A, Duval T, Hehn A, Froelicher Y, Bourgaud F: **Coumarin and Furanocoumarin Quantitation in Citrus Peel via Ultrapformance Liquid Chromatography Coupled with Mass Spectrometry (UPLC-MS).** *J Agr Food Chem* 2013, **61**: 10677-10684.
16. Mercolini L, Mandrioli R, Ferranti A, Sorella V, Protti M, Epifano F, Curini M, Raggi MA: **Quantitative evaluation of auraptene and umbelliferone, chemopreventive coumarins in citrus fruits by HPLC-UV-FL-MS.** *J Agric Food Chem* 2013, **61**: 1694-1701.
17. Thongthoom T, Songsiang U, Phaosiri C, Yenjai C: **Biological activity of chemical constituents from Clausena harmandiana.** *Arch Pharm Res* 2010, **33**: 675-680.

18. Patil JR, Jayaprakasha GK, Kim J, Murthy KN, Chetti MB, Nam SY, Patil BS: **5-Geranyloxy-7-methoxycoumarin inhibits colon cancer (SW480) cells growth by inducing apoptosis.** *Planta Med* 2013, **79**: 219-226.
19. Gorgus E, Lohr C, Raquet N, Guth S, Schrenk D: **Limettin and furocoumarins in beverages containing citrus juices or extracts.** *Food Chem Toxicol* 2010, **48**: 93-98.
20. Pellati F, Benvenuti S: **Fast high-performance liquid chromatography analysis of phenethylamine alkaloids in Citrus natural products on a pentafluorophenylpropyl stationary phase.** *J Chromatogr A* 2007, **1165**: 58-66.
21. Davide Barreca EB, Corrado Caristi, Ugo Leuzzi, Giuseppe Gattuso: **Distribution of C- and O-glycosyl flavonoids, (3-hydroxy-3-methylglutaryl) glycosyl flavanones and furocoumarins in Citrus aurantium L. juice.** *Food Chem* 2011, **124**: 576–582.
22. Patil JR, Chidambara Murthy K, Jayaprakasha G, Chetti MB, Patil BS: **Bioactive compounds from Mexican lime (Citrus aurantifolia) juice induce apoptosis in human pancreatic cells.** *J Agric Food Chem* 2009, **57**: 10933-10942.
23. Breksa III AP, Kahn T, Zukas AA, Hidalgo MB, Yuen ML: **Limonoid content of sour orange varieties.** *J Sci Food Agric* 2011, **91**: 1789-1794.
24. Jayaprakasha GK, Dandekar DV, Tichy SE, Patil BS: **Simultaneous separation and identification of limonoids from citrus using liquid chromatography-collision-induced dissociation mass spectra.** *J Sep Sci* 2011, **34**: 2-10.
25. Kim J, Jayaprakasha GK, Patil BS: **Limonoids and their anti-proliferative and anti-aromatase properties in human breast cancer cells.** *Food Funct* 2013, **4**: 258-265.
26. Liao J, Xu T, Liu YH, Wang SZ: **A new limonoid from the seeds of Citrus reticulata Blanco.** *Nat*

- Prod Res* 2012, **26**: 756-761.
27. Mahmoud MF, Hamdan DI, Wink M, El-Shazly AM: **Hepatoprotective effect of limonin, a natural limonoid from the seed of Citrus aurantium var. bigaradia, on D-galactosamine-induced liver injury in rats.** *N-S Arch Pharmacol* 2014, **387**: 251-261.
28. Breksa III AP, Hidalgo MB, Yuen ML: **Liquid chromatography-electrospray ionisation mass spectrometry method for the rapid identification of citrus limonoid glucosides in citrus juices and extracts.** *Food chemistry* 2009, **117**: 739-744.
29. Bermejo A, Llosa MJ, Cano A: **Analysis of bioactive compounds in seven citrus cultivars.** *Food Sci Technol Int* 2011, **17**: 55-62.
30. Carmona L, Zacarías L, Rodrigo MJ: **Stimulation of coloration and carotenoid biosynthesis during postharvest storage of 'Navelina' orange fruit at 12°C.** *Postharvest Biol Tec* 2012, **74**: 108-117.
31. Poiroux-Gonord F, Fanciullino AL, Bert L, Urban L: **Effect of fruit load on maturity and carotenoid content of clementine (Citrus clementina Hort. ex Tan.) fruits.** *J Sci Food Agric* 2012, **92**: 2076-2083.
32. Rodrigo MJ, Marcos JF, Zacarias L: **Biochemical and molecular analysis of carotenoid biosynthesis in flavedo of orange (Citrus sinensis L.) during fruit development and maturation.** *J Agric Food Chem* 2004, **52**: 6724-6731.
33. Cheong MW, Chong ZS, Liu SQ, Zhou W, Curran P, Bin Y: **Characterisation of calamansi (Citrus microcarpa). Part I: volatiles, aromatic profiles and phenolic acids in the peel.** *Food Chem* 2012, **134**: 686-695.
34. Ma YQ, Ye XQ, Fang ZX, Chen JC, Xu GH, Liu DH: **Phenolic compounds and antioxidant**

- activity of extracts from ultrasonic treatment of Satsuma Mandarin (Citrus unshiu Marc.) peels.** *J Agric Food Chem* 2008, **56**: 5682-5690.
35. Manthey JA, Grohmann K: **Phenols in citrus peel byproducts. Concentrations of hydroxycinnamates and polymethoxylated flavones in citrus peel molasses.** *J Agric Food Chem* 2001, **49**: 3268-3273.
36. Xu G, Ye X, Liu D, Ma Y, Chen J: **Composition and distribution of phenolic acids in Ponkan (Citrus poonensis Hort. ex Tanaka) and Huyou ( Citrus paradisi Macf. Changshanhuoyou) during maturity.** *J Food Compos Anal* 2008, **21**: 382-389.
37. Moulehi I, Bourgou S, Ourghemmi I, Tounsi MS: **Variety and ripening impact on phenolic composition and antioxidant activity of mandarin (Citrus reticulata Blanco) and bitter orange (Citrus aurantium L.) seeds extracts.** *Ind Crop Prod* 2012, **39**: 74-80.
38. Chen ML, Yang DJ, Liu SC: **Effects of drying temperature on the flavonoid, phenolic acid and antioxidative capacities of the methanol extract of citrus fruit (Citrus sinensis (L.) Osbeck) peels.** *Int J Food Sci Tech* 2011, **46**: 1179-1185.
39. Hayat K, Hussain S, Abbas S, Farooq U, Ding B, Xia S, Jia C, Zhang X, Xia W: **Optimized microwave-assisted extraction of phenolic acids from citrus mandarin peels and evaluation of antioxidant activity in vitro.** *Sep Purif Technol* 2009, **70**: 63-70.
40. Jabri Karoui I, Marzouk B: **Characterization of bioactive compounds in Tunisian bitter orange (Citrus aurantium L.) peel and juice and determination of their antioxidant activities.** *Biomed Res Int* 2013, **2013**: 345415.
41. Arbo MD, Larentis ER, Linck VM, Aboy AL, Pimentel AL, Henriques AT, Dallegrave E, Garcia SC, Leal MB, Limberger RP: **Concentrations of p-synephrine in fruits and leaves of Citrus**



species (Rutaceae) and the acute toxicity testing of *Citrus aurantium* extract and p-synephrine. *Food Chem Toxicol* 2008, **46**: 2770-2775.

42. Abad-Garcia B, Berrueta LA, Garmon-Lobato S, Urkaregi A, Gallo B, Vicente F: **Chemometric characterization of fruit juices from Spanish cultivars according to their phenolic compound contents: I. Citrus fruits.** *J Agric Food Chem* 2012, **60**: 3635-3644.
