# Supplementary material for: Citrus fruits as a treasure trove of active natural metabolites that potentially provide benefits for human health
Source: PubMed Central journal article supplement (PMC4690266; doi:10.1186/s13065-015-0145-9), 2015-12-24
Supplement: 13065_2015_145_MOESM3_ESM.pdf [file 13065_2015_145_MOESM3_ESM.pdf]

**Additional file 3 volatile compounds isolated from *Citrus* species.**

| compounds             | source                                                                                                                                                                                                                                                                                                                                                                                                                                                                 | ref.                    |
|-----------------------|------------------------------------------------------------------------------------------------------------------------------------------------------------------------------------------------------------------------------------------------------------------------------------------------------------------------------------------------------------------------------------------------------------------------------------------------------------------------|-------------------------|
| $\alpha$ -pinene      | CGG <sup>d</sup> , CCL <sup>a</sup> , CCL <sup>d</sup> , CCLT <sup>d</sup> , CSI <sup>a</sup> , CSI <sup>c</sup> ,<br>CSI <sup>d</sup> , CAT <sup>a</sup> , CAT <sup>d</sup> , CAT <sup>e</sup> , CU <sup>a</sup> , CLI <sup>a</sup> , CLI <sup>c</sup> ,<br>CR <sup>a</sup> , CR <sup>c</sup> , CK <sup>a</sup> , CME <sup>c</sup> , CAF <sup>e</sup> , CB <sup>e</sup> , CME <sup>c</sup> ,<br>CP <sup>a</sup> , CP <sup>c</sup> , CN <sup>a</sup> , CD <sup>a</sup> | [1-15]                  |
| $\beta$ -pinene       | CAT <sup>a</sup> , CAT <sup>e</sup> , CCL <sup>a</sup> , CCL <sup>d</sup> , CU <sup>a</sup> , CSI <sup>a</sup> ,<br>CSI <sup>c</sup> , CSI <sup>d</sup> , CGG <sup>d</sup> , CCLT <sup>d</sup> , CLI <sup>a</sup> , CLI <sup>c</sup> ,<br>CR <sup>a</sup> , CR <sup>c</sup> , CME <sup>c</sup> , CAF <sup>e</sup> , CB <sup>e</sup> , CME <sup>c</sup> , CP <sup>a</sup> ,<br>CP <sup>c</sup> , CN <sup>a</sup> , CD <sup>a</sup>                                      | [1-4,6-15]              |
| sabinene              | CAT <sup>a</sup> , CLI <sup>c</sup> , CR <sup>c</sup> , CSI <sup>c</sup> , CME <sup>c</sup> , CAF <sup>e</sup> ,<br>CAT <sup>e</sup> , CB <sup>e</sup> , CME <sup>c</sup> , CD <sup>a</sup> , CN <sup>a</sup> , CP <sup>a</sup> , CLI <sup>a</sup> ,<br>CR <sup>a</sup> , CSI <sup>a</sup>                                                                                                                                                                             | [2-4,6,8,10,11,13-15]   |
| myrcene               | CAT <sup>a</sup> , CAT <sup>d</sup> , CCL <sup>a</sup> , CCL <sup>d</sup> , CU <sup>a</sup> , CSI <sup>a</sup> ,<br>CSI <sup>c</sup> , CSI <sup>d</sup> , CGG <sup>d</sup> , CCLT <sup>d</sup> , CLI <sup>c</sup> , CR <sup>c</sup> ,<br>CK <sup>a</sup> , CME <sup>c</sup> , CAF <sup>e</sup> , CAT <sup>e</sup> , CB <sup>e</sup> , CME <sup>c</sup> ,<br>CP <sup>c</sup> , CN <sup>a</sup> , CD <sup>a</sup> , CP <sup>a</sup> , CLI <sup>a</sup> , CR <sup>a</sup> | [1-6,8-15]              |
| $\alpha$ -terpinene   | CAT <sup>a</sup> , CAT <sup>e</sup> , CGG <sup>d</sup> , CCL <sup>d</sup> , CCLT <sup>d</sup> , CSI <sup>d</sup> ,<br>CLI <sup>a</sup> , CLI <sup>c</sup> , CME <sup>c</sup> , CAF <sup>e</sup> , CME <sup>c</sup> , CD <sup>a</sup> ,<br>CP <sup>a</sup> , CR <sup>a</sup> , CSI <sup>a</sup>                                                                                                                                                                         | [1,3,4,6-8,10,14,15]    |
| $\gamma$ -terpinene   | CGG <sup>d</sup> , CCL <sup>d</sup> , CCLT <sup>d</sup> , CSI <sup>d</sup> , CLI <sup>a</sup> , CLI <sup>c</sup> ,<br>CK <sup>a</sup> , CU <sup>a</sup> , CME <sup>c</sup> , CAF <sup>e</sup> , CAT <sup>e</sup> , CB <sup>e</sup> ,<br>CME <sup>c</sup> , CD <sup>a</sup> , CN <sup>a</sup> , CP <sup>a</sup> , CR <sup>a</sup> , CSI <sup>a</sup>                                                                                                                    | [1,4-8,10,11,13,14,15]  |
| p-cimene              | CME <sup>c</sup>                                                                                                                                                                                                                                                                                                                                                                                                                                                       | [6]                     |
| 1,4-cineole           | CCL <sup>d</sup> , CSI <sup>d</sup>                                                                                                                                                                                                                                                                                                                                                                                                                                    | [1]                     |
| 1,8-cineole           | CAT <sup>a</sup> , CAT <sup>d</sup> , CLI <sup>c</sup> , CGG <sup>d</sup> , CCL <sup>d</sup> , CCLT <sup>d</sup> ,<br>CSI <sup>d</sup>                                                                                                                                                                                                                                                                                                                                 | [1,3,4]                 |
| 1,8-cineol            | CD <sup>a</sup>                                                                                                                                                                                                                                                                                                                                                                                                                                                        | [14]                    |
| E- $\beta$ -ocimene   | CAT <sup>a</sup> , CLI <sup>c</sup> , CME <sup>c</sup> , CAF <sup>e</sup> , CB <sup>e</sup> , CME <sup>c</sup> ,<br>CN <sup>a</sup> , CP <sup>a</sup> , CLI <sup>a</sup> , CR <sup>a</sup> , CSI <sup>a</sup>                                                                                                                                                                                                                                                          | [3,4,6,8,10,15]         |
| cis- $\beta$ -ocimene | CAT <sup>a</sup>                                                                                                                                                                                                                                                                                                                                                                                                                                                       | [2]                     |
| (Z)- $\beta$ -ocimene | CAF <sup>e</sup> , CAT <sup>e</sup> , CME <sup>c</sup> , CN <sup>a</sup> , CP <sup>a</sup> , CLI <sup>a</sup> , CR <sup>a</sup> ,<br>CSI <sup>a</sup>                                                                                                                                                                                                                                                                                                                  | [8,10,15]               |
| (Z)-ocimene           | CGG <sup>d</sup>                                                                                                                                                                                                                                                                                                                                                                                                                                                       | [1]                     |
| terpinolene           | CAT <sup>a</sup> , CAT <sup>e</sup> , CGG <sup>d</sup> , CCL <sup>d</sup> , CCLT <sup>d</sup> , CSI <sup>c</sup> ,<br>CSI <sup>d</sup> , CLI <sup>a</sup> , CLI <sup>c</sup> , CME <sup>c</sup> , CAF <sup>e</sup> , CB <sup>e</sup> , CD <sup>a</sup> ,<br>CN <sup>a</sup> , CP <sup>a</sup> , CR <sup>a</sup> , CSI <sup>a</sup>                                                                                                                                     | [1,3,4,6-8,10,11,13-15] |
| cis-linalool oxide    | CAT <sup>a</sup> , CAT <sup>d</sup> , CAT <sup>e</sup> , CAF <sup>e</sup> , CB <sup>e</sup>                                                                                                                                                                                                                                                                                                                                                                            | [3,8]                   |
| trans-linalool oxide  | CAT <sup>a</sup> , CAT <sup>d</sup>                                                                                                                                                                                                                                                                                                                                                                                                                                    | [3]                     |

|                     |                                                                                                                                                                                                                                                                                                                                                                                           |                         |
|---------------------|-------------------------------------------------------------------------------------------------------------------------------------------------------------------------------------------------------------------------------------------------------------------------------------------------------------------------------------------------------------------------------------------|-------------------------|
| (Z)-linalool oxide  | CGG <sup>d</sup> , CCLT <sup>d</sup> , CN <sup>a</sup>                                                                                                                                                                                                                                                                                                                                    | [1,15]                  |
| (E)-linalool oxide  | CGG <sup>d</sup> , CN <sup>a</sup>                                                                                                                                                                                                                                                                                                                                                        | [1,15]                  |
| linalool            | CAT <sup>a</sup> , CAT <sup>e</sup> , CLI <sup>c</sup> , CR <sup>c</sup> , CME <sup>c</sup> , CAF <sup>e</sup> ,<br>CB <sup>e</sup> , CCL <sup>a</sup> , CCL <sup>d</sup> , CU <sup>a</sup> , CSI <sup>a</sup> , CSI <sup>c</sup> , CSI <sup>d</sup> ,<br>CGG <sup>d</sup> , CCLT <sup>d</sup> , CN <sup>a</sup> , CD <sup>a</sup> , CP <sup>a</sup> , CLI <sup>a</sup> , CR <sup>a</sup> | [1-4,6,8-10,12,14,15]   |
| linalyl acetate     | CAT <sup>a</sup> , CAT <sup>e</sup> , CGG <sup>d</sup> , CCL <sup>d</sup> , CCLT <sup>d</sup> , CSI <sup>d</sup> ,<br>CAF <sup>e</sup> , CB <sup>e</sup>                                                                                                                                                                                                                                  | [1-3,8]                 |
| neryl acetate       | CAT <sup>a</sup> , CAT <sup>e</sup> , CAT <sup>d</sup> , CB <sup>e</sup> , CGG <sup>d</sup> , CCL <sup>d</sup> ,<br>CCLT <sup>d</sup> , CSI <sup>d</sup> , CME <sup>c</sup> , CLI <sup>a</sup> , CLI <sup>c</sup> , CAF <sup>e</sup> ,<br>CN <sup>a</sup> , CP <sup>a</sup> , CR <sup>a</sup> , CSI <sup>a</sup>                                                                          | [1-3,6-8,10,11,12,15]   |
| geranyl acetate     | CAT <sup>a</sup> , CAT <sup>e</sup> , CGG <sup>d</sup> , CCL <sup>d</sup> , CCLT <sup>d</sup> , CSI <sup>d</sup> ,<br>CME <sup>c</sup> , CAF <sup>e</sup> , CB <sup>e</sup> , CLI <sup>c</sup> , CN <sup>a</sup> , CP <sup>a</sup> , CLI <sup>a</sup> ,<br>CR <sup>a</sup> , CSI <sup>a</sup>                                                                                             | [1,3,6,8,10,11,12,15]   |
| bornyl acetate      | CGG <sup>d</sup> , CCL <sup>d</sup> , CCLT <sup>d</sup> , CSI <sup>d</sup> , CAT <sup>a</sup> , CAF <sup>e</sup> ,<br>CD <sup>a</sup>                                                                                                                                                                                                                                                     | [1,3,8,14]              |
| propyl acetate      | CCLT <sup>d</sup>                                                                                                                                                                                                                                                                                                                                                                         | [1]                     |
| farnesyl acetate    | CAT <sup>a</sup>                                                                                                                                                                                                                                                                                                                                                                          | [3]                     |
| terpinene-4-ol      | CAT <sup>a</sup>                                                                                                                                                                                                                                                                                                                                                                          | [3]                     |
| caryophyllene       | CAT <sup>a</sup> , CAT <sup>e</sup> , CGG <sup>d</sup> , CSI <sup>c</sup> , CSI <sup>d</sup> , CLI <sup>c</sup> ,<br>CME <sup>c</sup> , CAF <sup>e</sup> , CB <sup>e</sup> , CD <sup>a</sup> , CN <sup>a</sup> , CP <sup>a</sup> , CLI <sup>a</sup> ,<br>CR <sup>a</sup> , CSI <sup>a</sup>                                                                                               | [1,3,4,6,8,10,11,13-15] |
| $\beta$ -elemene    | CSI <sup>c</sup> , CME <sup>c</sup> , CN <sup>a</sup> , CP <sup>a</sup> , CLI <sup>a</sup> , CR <sup>a</sup> , CSI <sup>a</sup>                                                                                                                                                                                                                                                           | [4,6,10,15]             |
|                     | CAT <sup>a</sup>                                                                                                                                                                                                                                                                                                                                                                          | [3]                     |
| $\gamma$ -elemene   |                                                                                                                                                                                                                                                                                                                                                                                           |                         |
| $\delta$ -elemene   | CME <sup>c</sup> , CN <sup>a</sup> , CP <sup>a</sup> , CSI <sup>a</sup>                                                                                                                                                                                                                                                                                                                   | [10, 15]                |
| neral               | CAT <sup>a</sup> , CAT <sup>e</sup> , CGG <sup>d</sup> , CCL <sup>d</sup> , CCLT <sup>d</sup> , CSI <sup>d</sup> ,<br>CME <sup>c</sup> , CLI <sup>a</sup> , CAF <sup>e</sup> , CLI <sup>c</sup> , CN <sup>a</sup> , CP <sup>a</sup> , CR <sup>a</sup> ,<br>CSI <sup>a</sup>                                                                                                               | [1,3,6-8,10-13, 15]     |
| nerol               | CAT <sup>a</sup> , CAT <sup>e</sup> , CGG <sup>d</sup> , CCL <sup>d</sup> , CCLT <sup>d</sup> , CSI <sup>d</sup> ,<br>CME <sup>c</sup> , CLI <sup>a</sup> , CAF <sup>e</sup> , CLI <sup>c</sup> , CN <sup>a</sup> , CD <sup>a</sup>                                                                                                                                                       | [1,3,6-8,11,12,14,15]   |
|                     | CLI <sup>c</sup> , CN <sup>a</sup> , CR <sup>a</sup> ,                                                                                                                                                                                                                                                                                                                                    | [13,15]                 |
| $\alpha$ -farnesene |                                                                                                                                                                                                                                                                                                                                                                                           |                         |
| $\beta$ -farnesene  | CAT <sup>a</sup> , CAT <sup>e</sup> , CSI <sup>d</sup> , CLI <sup>c</sup> , CME <sup>c</sup> , CAF <sup>e</sup> ,<br>CB <sup>e</sup> , CLI <sup>a</sup>                                                                                                                                                                                                                                   | [1,3,4,6,8,10,15]       |

|                        |                                                                                                                                                                                                                                                                                                                                                                                                                                                                       |                       |
|------------------------|-----------------------------------------------------------------------------------------------------------------------------------------------------------------------------------------------------------------------------------------------------------------------------------------------------------------------------------------------------------------------------------------------------------------------------------------------------------------------|-----------------------|
| $\alpha$ -terpineol    | CAT <sup>a</sup> , CAT <sup>d</sup> , CAT <sup>e</sup> , CLI <sup>c</sup> , CME <sup>c</sup> , CAF <sup>e</sup> ,<br>CB <sup>e</sup>                                                                                                                                                                                                                                                                                                                                  | [2,3,4,6,8,10]        |
| $\delta$ -cadinene     | CAT <sup>a</sup> , CSI <sup>c</sup> , CME <sup>c</sup> , CD <sup>a</sup> , CN <sup>a</sup> , CR <sup>a</sup> , CSI <sup>a</sup>                                                                                                                                                                                                                                                                                                                                       | [3,4,6,14,15]         |
| $\gamma$ -cadinene     | CME <sup>c</sup> , CAF <sup>e</sup> , CAT <sup>e</sup>                                                                                                                                                                                                                                                                                                                                                                                                                | [6,8]                 |
| geraniol               | CAT <sup>a</sup> , CME <sup>c</sup> , CLI <sup>a</sup> , CLI <sup>c</sup> , CGG <sup>d</sup> , CCL <sup>d</sup> ,<br>CCLT <sup>d</sup> , CSI <sup>d</sup> , CN <sup>a</sup> , CP <sup>a</sup> , CLI <sup>a</sup> , CR <sup>a</sup> , CSI <sup>a</sup>                                                                                                                                                                                                                 | [1,3,6,7,10,11,12,15] |
| nerolidol              | CAT <sup>a</sup> , CAT <sup>e</sup> , CN <sup>a</sup> , CP <sup>a</sup> , CSI <sup>a</sup>                                                                                                                                                                                                                                                                                                                                                                            | [3,8,15]              |
| thujene                | CME <sup>c</sup> , CAF <sup>e</sup> , CAT <sup>d</sup> , CAT <sup>e</sup> , CB <sup>e</sup> , CLI <sup>a</sup> ,<br>CLI <sup>c</sup> , CME <sup>c</sup> , CD <sup>a</sup> , CN <sup>a</sup> , CP <sup>a</sup> , CR <sup>a</sup> , CSI <sup>a</sup>                                                                                                                                                                                                                    | [3,4,6,8,10,13,14,15] |
| tricyclen              | CAT <sup>d</sup>                                                                                                                                                                                                                                                                                                                                                                                                                                                      | [3]                   |
| $\alpha$ -phellandrene | CAT <sup>d</sup> , CAT <sup>e</sup> , CSI <sup>a</sup> , CSI <sup>d</sup> , CGG <sup>d</sup> , CCL <sup>d</sup> ,<br>CCLT <sup>d</sup> , CME <sup>c</sup> , CAF <sup>e</sup> , CME <sup>c</sup> , CN <sup>a</sup> , CP <sup>a</sup> ,<br>CLI <sup>a</sup> , CR <sup>a</sup>                                                                                                                                                                                           | [1,3,6-8,10,15]       |
| $\beta$ -phellandrene  | CLI <sup>c</sup> , CAT <sup>c</sup> , CAT <sup>e</sup> , CAF <sup>e</sup> , CD <sup>a</sup> , CN <sup>a</sup> , CP <sup>a</sup> ,<br>CLI <sup>a</sup> , CR <sup>a</sup> , CSI <sup>a</sup>                                                                                                                                                                                                                                                                            | [4,8,14,15]           |
| Oxyde decaryophyllene  | CAT <sup>d</sup>                                                                                                                                                                                                                                                                                                                                                                                                                                                      | [3]                   |
| Octanal                | CAT <sup>a</sup> , CAT <sup>c</sup> , CGG <sup>d</sup> , CCL <sup>d</sup> , CCLT <sup>d</sup> , CSI <sup>d</sup> ,<br>CLI <sup>c</sup> , CR <sup>c</sup> , CME <sup>c</sup>                                                                                                                                                                                                                                                                                           | [1,2,4,10]            |
| limonene               | CAT <sup>a</sup> , CAT <sup>d</sup> , CAF <sup>e</sup> , CCL <sup>a</sup> , CCL <sup>d</sup> , CU <sup>a</sup> ,<br>CSI <sup>a</sup> , CSI <sup>c</sup> , CSI <sup>d</sup> , CGG <sup>d</sup> , CCLT <sup>d</sup> , CLI <sup>a</sup> ,<br>CLI <sup>c</sup> , CR <sup>c</sup> , CK <sup>a</sup> , CU <sup>a</sup> , CME <sup>c</sup> , CB <sup>e</sup> , CME <sup>c</sup> ,<br>CP <sup>c</sup> , CN <sup>a</sup> , CD <sup>a</sup> , CP <sup>a</sup> , CR <sup>a</sup> | [1-10,12-15]          |
| $\alpha$ -terpineol    | CAT <sup>a</sup> , CCL <sup>a</sup> , CCL <sup>d</sup> , CU <sup>a</sup> , CSI <sup>a</sup> , CSI <sup>d</sup> ,<br>CGG <sup>d</sup> , CCLT <sup>d</sup> , CLI <sup>c</sup> , CD <sup>a</sup> , CN <sup>a</sup> , CP <sup>a</sup> , CLI <sup>a</sup> ,<br>CR <sup>a</sup>                                                                                                                                                                                             | [1,2,4,9,11,14,15]    |
| decanal                | CAT <sup>a</sup> , CGG <sup>d</sup> , CCL <sup>d</sup> , CCLT <sup>d</sup> , CSI <sup>d</sup> , CR <sup>c</sup> ,<br>CSI <sup>c</sup> , CME <sup>c</sup> , CN <sup>a</sup> , CD <sup>a</sup>                                                                                                                                                                                                                                                                          | [1,2,4,9,10,12,14]    |
| n-decanal              | CME <sup>c</sup> , CAF <sup>e</sup> , CAT <sup>e</sup> , CB <sup>e</sup>                                                                                                                                                                                                                                                                                                                                                                                              | [6,8]                 |
| citronellal            | CCL <sup>a</sup> , CCL <sup>d</sup> , CU <sup>a</sup> , CSI <sup>a</sup> , CSI <sup>c</sup> , CLI <sup>c</sup> , CR <sup>c</sup> ,<br>CME <sup>c</sup> , CAF <sup>e</sup> , CAT <sup>e</sup> , CN <sup>a</sup> , CLI <sup>a</sup> , CR <sup>a</sup>                                                                                                                                                                                                                   | [1,4,6,8-10,12,15]    |
| 2-carene               | CGG <sup>d</sup> , CCLT <sup>d</sup> , CSI <sup>d</sup>                                                                                                                                                                                                                                                                                                                                                                                                               | [1]                   |
| 3-carene               | CGG <sup>d</sup> , CCL <sup>d</sup> , CCLT <sup>d</sup> , CSI <sup>d</sup> , CAF <sup>e</sup> , CAT <sup>e</sup> ,<br>CME <sup>c</sup>                                                                                                                                                                                                                                                                                                                                | [1,8,10]              |
| 4-carene               | CD <sup>a</sup>                                                                                                                                                                                                                                                                                                                                                                                                                                                       | [14]                  |
| 2,4-nonadienal         | CGG <sup>d</sup>                                                                                                                                                                                                                                                                                                                                                                                                                                                      | [1]                   |

|                         |                                                                                                                                                                                              |                |
|-------------------------|----------------------------------------------------------------------------------------------------------------------------------------------------------------------------------------------|----------------|
| 2,3-pentanedione        | CGG <sup>d</sup> , CCL <sup>d</sup> , CCLT <sup>d</sup> , CSI <sup>d</sup>                                                                                                                   | [1]            |
| 2,4-decadienal          | CGG <sup>d</sup> , CCL <sup>d</sup> , CCLT <sup>d</sup> , CSI <sup>d</sup> , CN <sup>a</sup>                                                                                                 | [1,12]         |
| p-cymene                | CGG <sup>d</sup> , CLI <sup>c</sup> , CR <sup>c</sup> , CSI <sup>c</sup> , CAF <sup>e</sup> , CAT <sup>e</sup> , CD <sup>a</sup>                                                             | [1,4,8,13,14]  |
| nootkatone              | CGG <sup>d</sup> , CCLT <sup>d</sup> , CSI <sup>c</sup> , CSI <sup>d</sup> , CLI <sup>c</sup> , CME <sup>c</sup>                                                                             | [1,4,10]       |
| $\alpha$ -humulene      | CGG <sup>d</sup> , CCL <sup>d</sup> , CCLT <sup>d</sup> , CSI <sup>d</sup> , CME <sup>c</sup> , CAF <sup>e</sup> ,<br>CAT <sup>e</sup> , CB <sup>e</sup> , CLI <sup>c</sup>                  | [1,6,8,10,13]  |
| 1-pentanol              | CGG <sup>d</sup> , CCL <sup>d</sup> , CCLT <sup>d</sup> , CSI <sup>d</sup>                                                                                                                   | [1]            |
| 1-hexanol               | CGG <sup>d</sup> , CCL <sup>d</sup> , CCLT <sup>d</sup> , CSI <sup>d</sup>                                                                                                                   | [1]            |
| methyl hexanoate        | CGG <sup>d</sup> , CCLT <sup>d</sup> , CSI <sup>d</sup>                                                                                                                                      | [1]            |
| ethyl hexanoate         | CGG <sup>d</sup> , CCL <sup>d</sup> , CCLT <sup>d</sup> , CSI <sup>d</sup>                                                                                                                   | [1]            |
| pseudocumene            | CGG <sup>d</sup> , CCL <sup>d</sup> , CCLT <sup>d</sup> , CSI <sup>d</sup>                                                                                                                   | [1]            |
| 6-methyl-5-hepten-2-one | CGG <sup>d</sup> , CCL <sup>d</sup> , CCLT <sup>d</sup>                                                                                                                                      | [1]            |
| heptanal                | CGG <sup>d</sup> , CCL <sup>d</sup> , CCLT <sup>d</sup> , CSI <sup>d</sup>                                                                                                                   | [1]            |
| nonanal                 | CGG <sup>d</sup> , CCL <sup>d</sup> , CCLT <sup>d</sup> , CSI <sup>d</sup> , CAF <sup>e</sup> , CAT <sup>e</sup> ,<br>CB <sup>e</sup> , CME <sup>c</sup> , CN <sup>a</sup> , CD <sup>a</sup> | [1,8,10,12,14] |
| 1-nonanol               | CGG <sup>d</sup> , CCL <sup>d</sup> , CCLT <sup>d</sup> , CSI <sup>d</sup> , CN <sup>a</sup>                                                                                                 | [1,12]         |
| n-nonanal               | CLI <sup>c</sup> , CSI <sup>c</sup> , CME <sup>c</sup>                                                                                                                                       | [4,6]          |
| 2-octenal               | CGG <sup>d</sup> , CCL <sup>d</sup> , CCLT <sup>d</sup> , CSI <sup>d</sup>                                                                                                                   | [1]            |
| 2-nonenal               | CGG <sup>d</sup> , CCL <sup>d</sup> , CCLT <sup>d</sup> , CSI <sup>d</sup> , CN <sup>a</sup>                                                                                                 | [1,12]         |
| 2-heptenal              | CGG <sup>d</sup> , CCL <sup>d</sup> , CCLT <sup>d</sup> , CSI <sup>d</sup>                                                                                                                   | [1]            |
| 1-octen-3-one           | CGG <sup>d</sup> , CCL <sup>d</sup> , CCLT <sup>d</sup> , CSI <sup>d</sup>                                                                                                                   | [1]            |
| 1-octen-3-ol            | CGG <sup>d</sup> , CCL <sup>d</sup> , CCLT <sup>d</sup> , CSI <sup>d</sup>                                                                                                                   | [1]            |
| hexanal                 | CGG <sup>d</sup> , CCL <sup>d</sup> , CCLT <sup>d</sup> , CSI <sup>d</sup>                                                                                                                   | [1]            |
| pentanal                | CGG <sup>d</sup> , CCL <sup>d</sup> , CCLT <sup>d</sup> , CSI <sup>d</sup>                                                                                                                   | [1]            |
| 2-pentylfuran           | CGG <sup>d</sup> , CCL <sup>d</sup> , CCLT <sup>d</sup> , CSI <sup>d</sup>                                                                                                                   | [1]            |
| 1-heptanol              | CGG <sup>d</sup> , CCL <sup>d</sup> , CCLT <sup>d</sup> , CSI <sup>d</sup>                                                                                                                   | [1]            |
| $\alpha$ -copaene       | CGG <sup>d</sup> , CCL <sup>d</sup> , CCLT <sup>d</sup> , CSI <sup>d</sup> , CD <sup>a</sup> , CN <sup>a</sup> , ,<br>CR <sup>a</sup> , CSI <sup>a</sup>                                     | [1,14,15]      |
| $\beta$ -copaene        | CR <sup>c</sup> , CSI <sup>c</sup>                                                                                                                                                           | [4]            |
| valencene               | CGG <sup>d</sup> , CCL <sup>d</sup> , CCLT <sup>d</sup> , CSI <sup>d</sup> , CLI <sup>c</sup> , CR <sup>c</sup> ,<br>CME <sup>c</sup> , CLI <sup>a</sup> , CR <sup>a</sup>                   | [1,4,10,15]    |
| ethyl heptanoate        | CGG <sup>d</sup> , CCL <sup>d</sup> , CCLT <sup>d</sup> , CSI <sup>d</sup>                                                                                                                   | [1]            |
| 2-ethylfuran            | CGG <sup>d</sup> , CCL <sup>d</sup> , CCLT <sup>d</sup> , CSI <sup>d</sup>                                                                                                                   | [1]            |
| 2-methylfuran           | CGG <sup>d</sup> , CCL <sup>d</sup> , CCLT <sup>d</sup> , CSI <sup>d</sup>                                                                                                                   | [1]            |
| 3- methylfuran          | CGG <sup>d</sup> , CCL <sup>d</sup> , CCLT <sup>d</sup> , CSI <sup>d</sup>                                                                                                                   | [1]            |
| 2-pentenal              | CGG <sup>d</sup> , CCL <sup>d</sup> , CCLT <sup>d</sup> , CSI <sup>d</sup>                                                                                                                   | [1]            |
| 1-penten-3-one          | CGG <sup>d</sup> , CCL <sup>d</sup> , CCLT <sup>d</sup> , CSI <sup>d</sup>                                                                                                                   | [1]            |
| ethyl propanoate        | CGG <sup>d</sup> , CCL <sup>d</sup> , CCLT <sup>d</sup> , CSI <sup>d</sup>                                                                                                                   | [1]            |
| ethyl 2-methylbutanoate | CGG <sup>d</sup> , CCL <sup>d</sup> , CCLT <sup>d</sup> , CSI <sup>d</sup>                                                                                                                   | [1]            |
| 3-pentanone             | CGG <sup>d</sup> , CCL <sup>d</sup> , CCLT <sup>d</sup> , CSI <sup>d</sup>                                                                                                                   | [1]            |
| 1-penten-3-ol           | CGG <sup>d</sup> , CCL <sup>d</sup> , CCLT <sup>d</sup> , CSI <sup>d</sup>                                                                                                                   | [1]            |
| (Z)-3-hexenal           | CGG <sup>d</sup> , CCL <sup>d</sup> , CCLT <sup>d</sup> , CSI <sup>d</sup>                                                                                                                   | [1]            |
| (E)-2-hexenal           | CGG <sup>d</sup> , CCL <sup>d</sup> , CCLT <sup>d</sup> , CSI <sup>d</sup>                                                                                                                   | [1]            |
| geranylacetone          | CGG <sup>d</sup> , CCL <sup>d</sup> , CCLT <sup>d</sup> , CSI <sup>d</sup>                                                                                                                   | [1]            |

|                       |                                                                                                                                                                                                                                                                                        |                  |
|-----------------------|----------------------------------------------------------------------------------------------------------------------------------------------------------------------------------------------------------------------------------------------------------------------------------------|------------------|
|                       | CGG <sup>d</sup> , CCL <sup>d</sup> , CCLT <sup>d</sup> , CSI <sup>d</sup>                                                                                                                                                                                                             | [1]              |
| <i>β</i> -cyclocitral |                                                                                                                                                                                                                                                                                        |                  |
| <i>β</i> -ionone      | CGG <sup>d</sup> , CCL <sup>d</sup> , CCLT <sup>d</sup> , CSI <sup>d</sup>                                                                                                                                                                                                             | [1]              |
| hexyl acetate         | CGG <sup>d</sup> , CCL <sup>d</sup> , CCLT <sup>d</sup> , CSI <sup>d</sup>                                                                                                                                                                                                             | [1]              |
| ethyl nonanoate       | CGG <sup>d</sup> , CCL <sup>d</sup> , CCLT <sup>d</sup> , CSI <sup>d</sup>                                                                                                                                                                                                             | [1]              |
| methyl nonanoate      | CGG <sup>d</sup> , CCL <sup>d</sup> , CCLT <sup>d</sup> , CSI <sup>d</sup>                                                                                                                                                                                                             | [1]              |
| (Z)-3-hexen-1-ol      | CGG <sup>d</sup> , CCL <sup>d</sup> , CCLT <sup>d</sup> , CSI <sup>d</sup>                                                                                                                                                                                                             | [1]              |
| ethyl octanoate       | CGG <sup>d</sup> , CCL <sup>d</sup> , CCLT <sup>d</sup> , CSI <sup>d</sup>                                                                                                                                                                                                             | [1]              |
| methyl octanoate      | CGG <sup>d</sup> , CCL <sup>d</sup> , CCLT <sup>d</sup> , CSI <sup>d</sup>                                                                                                                                                                                                             | [1]              |
| gerania               | CGG <sup>d</sup> , CCL <sup>d</sup> , CCLT <sup>d</sup> , CSI <sup>d</sup>                                                                                                                                                                                                             | [1]              |
| heptyl acetate        | CGG <sup>d</sup> , CCL <sup>d</sup> , CCLT <sup>d</sup> , CSI <sup>d</sup>                                                                                                                                                                                                             | [1]              |
| ethyl decanoate       | CGG <sup>d</sup> , CCL <sup>d</sup> , CCLT <sup>d</sup> , CSI <sup>d</sup>                                                                                                                                                                                                             | [1]              |
| methyl decanoate      | CGG <sup>d</sup> , CCL <sup>d</sup> , CCLT <sup>d</sup> , CSI <sup>d</sup>                                                                                                                                                                                                             | [1]              |
| undecanal             | CGG <sup>d</sup> , CCL <sup>d</sup> , CCLT <sup>d</sup> , CSI <sup>d</sup> , CME <sup>c</sup> , CN <sup>a</sup>                                                                                                                                                                        | [1,10,12]        |
| (E)-2-hexen-1-ol      | CCL <sup>d</sup> , CSI <sup>d</sup>                                                                                                                                                                                                                                                    | [1]              |
| 1-decanol             | CCL <sup>d</sup> , CCLT <sup>d</sup> , CSI <sup>d</sup> , CN <sup>a</sup>                                                                                                                                                                                                              | [1,12]           |
| 1-octanol             | CGG <sup>d</sup> , CCL <sup>d</sup> , CCLT <sup>d</sup> , CSI <sup>d</sup>                                                                                                                                                                                                             | [1]              |
| n-octanol             | CSI <sup>c</sup>                                                                                                                                                                                                                                                                       | [4]              |
| citronellol           | CLI <sup>c</sup> , CGG <sup>d</sup> , CCL <sup>d</sup> , CCLT <sup>d</sup> , CSI <sup>d</sup> , CME <sup>c</sup> , CN <sup>a</sup> , CP <sup>a</sup> , CLI <sup>a</sup> , CR <sup>a</sup> , CSI <sup>a</sup>                                                                           | [1,4,10,12,15]   |
| ethyl acetate         | CGG <sup>d</sup> , CCL <sup>d</sup> , CCLT <sup>d</sup> , CSI <sup>d</sup>                                                                                                                                                                                                             | [1]              |
| carveol               | CGG <sup>d</sup> , CCL <sup>d</sup> , CCLT <sup>d</sup> , CSI <sup>d</sup> , CLI <sup>c</sup> , CR <sup>c</sup> , CSI <sup>c</sup> , CN <sup>a</sup> , CD <sup>a</sup>                                                                                                                 | [1,4,12,14]      |
| carvone               | CGG <sup>d</sup> , CCL <sup>d</sup> , CCLT <sup>d</sup> , CSI <sup>d</sup> , CLI <sup>c</sup> , CR <sup>c</sup> , CSI <sup>c</sup> , CN <sup>a</sup> , CD <sup>a</sup>                                                                                                                 | [1,4,12,14]      |
| ethanol               | CGG <sup>d</sup> , CCL <sup>d</sup> , CCLT <sup>d</sup> , CSI <sup>d</sup>                                                                                                                                                                                                             | [1]              |
| acetaldehyde          | CGG <sup>d</sup> , CCL <sup>d</sup> , CCLT <sup>d</sup> , CSI <sup>d</sup>                                                                                                                                                                                                             | [1]              |
| dodecanal             | CGG <sup>d</sup> , CCL <sup>d</sup> , CCLT <sup>d</sup> , CSI <sup>d</sup> , CME <sup>c</sup> , CN <sup>a</sup>                                                                                                                                                                        | [1,10,12]        |
| limonene oxide        | CGG <sup>d</sup> , CCL <sup>d</sup> , CCLT <sup>d</sup> , CSI <sup>d</sup> , CLI <sup>c</sup> , CSI <sup>c</sup> , CME <sup>c</sup> , CN <sup>a</sup> , CP <sup>a</sup> , CLI <sup>a</sup> , CR <sup>a</sup> , CSI <sup>a</sup>                                                        | [1,4,10,15]      |
| camphene              | CGG <sup>d</sup> , CCL <sup>d</sup> , CCLT <sup>d</sup> , CSI <sup>d</sup> , CME <sup>c</sup> , CAF <sup>e</sup> , CAT <sup>e</sup> , CB <sup>e</sup> , CME <sup>c</sup> , CD <sup>a</sup> , CN <sup>a</sup> , CP <sup>a</sup> , CLI <sup>a</sup> , CR <sup>a</sup> , CSI <sup>a</sup> | [1,6,8,10,14,15] |
| camphor               | CME <sup>c</sup> , CN <sup>a</sup> , CLI <sup>a</sup>                                                                                                                                                                                                                                  | [10,12,15]       |
| terpinen-4-ol         | CGG <sup>d</sup> , CCL <sup>d</sup> , CCLT <sup>d</sup> , CSI <sup>d</sup> , CME <sup>c</sup> , CAF <sup>e</sup> , CAT <sup>e</sup> , CB <sup>e</sup> , CLI <sup>c</sup> , CD <sup>a</sup>                                                                                             | [1,6,8,10,11,14] |
| perillaldehyde        | CGG <sup>d</sup> , CCL <sup>d</sup> , CCLT <sup>d</sup> , CSI <sup>d</sup>                                                                                                                                                                                                             | [1]              |
| carvyl acetate        | CGG <sup>d</sup> , CCL <sup>d</sup> , CCLT <sup>d</sup> , CSI <sup>d</sup>                                                                                                                                                                                                             | [1]              |
| citronellyl acetate   | CGG <sup>d</sup> , CCL <sup>d</sup> , CCLT <sup>d</sup> , CSI <sup>d</sup> , CME <sup>c</sup> , CLI <sup>a</sup>                                                                                                                                                                       | [1,6,10,15]      |

|                               |                                                                                                                                                                                                               |                   |
|-------------------------------|---------------------------------------------------------------------------------------------------------------------------------------------------------------------------------------------------------------|-------------------|
|                               | CSI <sup>a</sup>                                                                                                                                                                                              |                   |
| styrene                       | CGG <sup>d</sup> , CCL <sup>d</sup> , CCLT <sup>d</sup> , CSI <sup>d</sup>                                                                                                                                    | [1]               |
| nonyl acetate                 | CGG <sup>d</sup> , CCL <sup>d</sup> , CCLT <sup>d</sup> , CSI <sup>d</sup>                                                                                                                                    | [1]               |
| ethyl butanoate               | CGG <sup>d</sup> , CCL <sup>d</sup> , CCLT <sup>d</sup> , CSI <sup>d</sup>                                                                                                                                    | [1]               |
| decyl acetate                 | CGG <sup>d</sup> , CCL <sup>d</sup> , CCLT <sup>d</sup> , CSI <sup>d</sup>                                                                                                                                    | [1]               |
| terpinyl acetate              | CCL <sup>d</sup> , CCLT <sup>d</sup> , CSI <sup>d</sup> , CD <sup>a</sup>                                                                                                                                     | [1,14]            |
| octyl acetate                 | CGG <sup>d</sup> , CCL <sup>d</sup> , CCLT <sup>d</sup> , CSI <sup>d</sup> , CME <sup>c</sup>                                                                                                                 | [1,10]            |
| 3-methylbutanal               | CCL <sup>d</sup>                                                                                                                                                                                              | [1]               |
|                               | CGG <sup>d</sup>                                                                                                                                                                                              | [1]               |
| $\gamma$ -dodecalactone       |                                                                                                                                                                                                               |                   |
| iso-sylvestrene               | CSI <sup>c</sup>                                                                                                                                                                                              | [4]               |
| sabinene hydrate              | CLI <sup>c</sup> , CME <sup>c</sup> , CD <sup>a</sup> , CN <sup>a</sup> , CP <sup>a</sup> , CLI <sup>a</sup> , CR <sup>a</sup> ,<br>CSI <sup>a</sup>                                                          | [4,6,10,14,15]    |
| trans-p-mentha-2,8-dienol     | CR <sup>c</sup> , CSI <sup>c</sup>                                                                                                                                                                            | [4]               |
| cis-p-mentha-2,8-dienol       | CLI <sup>c</sup> , CR <sup>c</sup> , CSI <sup>c</sup>                                                                                                                                                         | [4]               |
| terpineol-4-ol                | CLI <sup>c</sup>                                                                                                                                                                                              | [4]               |
| cis-pinocarveol               | CR <sup>c</sup> , CSI <sup>c</sup>                                                                                                                                                                            | [4]               |
| cryptone                      | CR <sup>c</sup> , CSI <sup>c</sup>                                                                                                                                                                            | [4]               |
| p-mentha-1,8-dien-7-ol        | CR <sup>c</sup>                                                                                                                                                                                               | [4]               |
| cis-p-mentha-1(7),8-dien-2-ol | CLI <sup>c</sup> , CSI <sup>c</sup>                                                                                                                                                                           | [4]               |
| p-mentha-1(7),8(10)-dien-9-ol | CR <sup>a</sup>                                                                                                                                                                                               | [15]              |
| geranial                      | CLI <sup>a</sup> , CLI <sup>c</sup> , CSI <sup>c</sup> , CME <sup>c</sup> , CAF <sup>e</sup> , CAT <sup>e</sup> ,<br>CB <sup>e</sup> , CN <sup>a</sup> , CP <sup>a</sup> , CR <sup>a</sup> , CSI <sup>a</sup> | [4,6-8,10-13, 15] |
| p-mentha-1,8-dien-3-one       | CR <sup>c</sup> , CSI <sup>c</sup> , CN <sup>a</sup>                                                                                                                                                          | [4,15]            |
| perilla aldehyde              | CLI <sup>c</sup> , CR <sup>c</sup> , CSI <sup>c</sup> , CME <sup>c</sup> , CN <sup>a</sup> , CD <sup>a</sup>                                                                                                  | [4,6,10,12,14]    |
| thymol                        | CLI <sup>c</sup> , CR <sup>c</sup> , CSI <sup>c</sup> , CD <sup>a</sup>                                                                                                                                       | [4,14]            |
| isothymol                     | CD <sup>a</sup>                                                                                                                                                                                               | [14]              |
| carvacrol                     | CLI <sup>c</sup> , CR <sup>c</sup> , CSI <sup>c</sup> , CME <sup>c</sup>                                                                                                                                      | [4,10]            |
| perilla alcohol               | CR <sup>c</sup> , CSI <sup>c</sup>                                                                                                                                                                            | [4]               |
| patchenol                     | CR <sup>c</sup> , CSI <sup>c</sup>                                                                                                                                                                            | [4]               |
| $\beta$ -cubenene             | CR <sup>c</sup> , CSI <sup>c</sup>                                                                                                                                                                            | [4]               |
| sativene                      | CSI <sup>c</sup>                                                                                                                                                                                              | [4]               |
| (Z)-trimenal                  | CR <sup>c</sup>                                                                                                                                                                                               | [4]               |
| $\alpha$ -bergamotene         | CME <sup>c</sup> , CAF <sup>e</sup> , CAT <sup>e</sup> , CB <sup>e</sup> , CLI <sup>c</sup> , CLI <sup>a</sup>                                                                                                | [4,6,8,10,11,15]  |
| cis-thujopsene                | CLI <sup>c</sup>                                                                                                                                                                                              | [4]               |

|                                                               |                                                                                                                                                                         |               |
|---------------------------------------------------------------|-------------------------------------------------------------------------------------------------------------------------------------------------------------------------|---------------|
|                                                               | CLI <sup>c</sup> , CME <sup>c</sup>                                                                                                                                     | [4,10]        |
| <i>β</i> -santalene                                           |                                                                                                                                                                         |               |
| germacrene D                                                  | CLI <sup>c</sup> , CME <sup>c</sup> , CAF <sup>e</sup> , CAT <sup>e</sup> , CD <sup>a</sup> , CN <sup>a</sup> , CP <sup>a</sup> ,<br>CR <sup>a</sup> , CSI <sup>a</sup> | [4,6,8,14,15] |
|                                                               | CP <sup>a</sup>                                                                                                                                                         | [15]          |
| <i>β</i> -selinene                                            |                                                                                                                                                                         |               |
|                                                               | CLI <sup>c</sup>                                                                                                                                                        | [4]           |
| 7-epi- <i>α</i> -selinene                                     | CSI <sup>c</sup>                                                                                                                                                        | [4]           |
| bicyclogermacrene                                             | CLI <sup>c</sup> , CME <sup>c</sup>                                                                                                                                     | [4,10]        |
| <i>α</i> -muurolene                                           | SCI <sup>c</sup> , CD <sup>a</sup> , CN <sup>a</sup> , CR <sup>a</sup>                                                                                                  | [4,14,15]     |
| <i>γ</i> -muurolene                                           | CD <sup>a</sup>                                                                                                                                                         | [14]          |
|                                                               | CLI <sup>c</sup> , CME <sup>c</sup> , CAF <sup>e</sup> , CAT <sup>e</sup> , CB <sup>e</sup> , CN <sup>a</sup> , CLI <sup>a</sup>                                        | [4,6,8,10,15] |
| <i>β</i> -bisabolene                                          |                                                                                                                                                                         |               |
| ( <i>Z</i> )- <i>a</i> -bisabolene                            | CME <sup>c</sup> , CLI <sup>a</sup>                                                                                                                                     | [10,15]       |
|                                                               | CME <sup>c</sup>                                                                                                                                                        | [10]          |
| <i>γ</i> -bisabolene                                          |                                                                                                                                                                         |               |
| spathulenol                                                   | CLI <sup>c</sup> , CSI <sup>c</sup>                                                                                                                                     | [4]           |
| caryophyllene oxide                                           | CLI <sup>c</sup> , CSI <sup>c</sup> , CAF <sup>e</sup> , CAT <sup>e</sup> , CB <sup>e</sup>                                                                             | [4,8]         |
| <i>a</i> -bisabolool                                          | CLI <sup>c</sup>                                                                                                                                                        | [4]           |
|                                                               | CSI <sup>c</sup>                                                                                                                                                        | [4]           |
| <i>β</i> -sinensal                                            |                                                                                                                                                                         |               |
| (3 <i>E</i> ,5 <i>Z</i> )-undeca-1,3,5-triene                 | CK <sup>a</sup> , CU <sup>a</sup>                                                                                                                                       | [5]           |
| (3 <i>E</i> ,5 <i>Z</i> .8 <i>Z</i> )-undeca-1,3,5,8-tetraene | CK <sup>a</sup> , CU <sup>a</sup>                                                                                                                                       | [5]           |
| 2,3-dihydro-3,5-dihydroxy-6-methyl-4 <i>H</i> -Pyran-4-one    | CME <sup>c</sup>                                                                                                                                                        | [6]           |
| 2,3-dihydrobenzofuran                                         | CME <sup>c</sup>                                                                                                                                                        | [6]           |

|                                       |                                                                                           |           |
|---------------------------------------|-------------------------------------------------------------------------------------------|-----------|
| $\alpha$ -cubebene                    | CD <sup>a</sup>                                                                           | [14]      |
| $\beta$ -cubebene                     | CME <sup>c</sup> , CN <sup>a</sup> , CR <sup>a</sup> ,                                    | [6,15]    |
| tetradecanal                          | CME <sup>c</sup> , CAF <sup>e</sup> , CAT <sup>e</sup>                                    | [6,8,10]  |
| $\alpha$ -bisabolol                   | CAF <sup>e</sup> , CAT <sup>e</sup> , CME <sup>c</sup> , CLI <sup>a</sup>                 | [8,10,15] |
| $\beta$ -bisabolol                    | CME <sup>c</sup>                                                                          | [6]       |
| eicosane                              | CME <sup>c</sup> , CAF <sup>e</sup> , CAT <sup>e</sup>                                    | [6, 8]    |
| docosane                              | CME <sup>c</sup>                                                                          | [6]       |
| citropten                             | CME <sup>c</sup>                                                                          | [6]       |
| oxypeucedanin                         | CME <sup>c</sup>                                                                          | [6]       |
| alloocimene                           | CAT <sup>e</sup>                                                                          | [8]       |
| fenchyl acetate                       | CAF <sup>e</sup> , CAT <sup>e</sup>                                                       | [8]       |
| bicyclosquiphellandren                | CAF <sup>e</sup> , CAT <sup>e</sup> , CD <sup>a</sup>                                     | [8,14]    |
| e                                     |                                                                                           |           |
| osthol                                | CAT <sup>e</sup>                                                                          | [8]       |
| manoyl oxide                          | CAF <sup>e</sup> , CAT <sup>e</sup>                                                       | [8]       |
| heneicosane                           | CAF <sup>e</sup> , CAT <sup>e</sup>                                                       | [8]       |
| tricosane                             | CAF <sup>e</sup> , CAT <sup>e</sup>                                                       | [8]       |
| pentacosane                           | CAF <sup>e</sup> , CAT <sup>e</sup>                                                       | [8]       |
| nonacosane                            | CAF <sup>e</sup> , CAT <sup>e</sup>                                                       | [8]       |
| decane                                | CME <sup>c</sup>                                                                          | [10]      |
| borneol                               | CME <sup>c</sup> , CLI <sup>a</sup>                                                       | [10, 15]  |
| p-cymen-8-ol                          | CME <sup>c</sup>                                                                          | [10]      |
| dihydrolinalyl acetate                | CME <sup>c</sup>                                                                          | [10]      |
| norbornanol                           | CME <sup>c</sup>                                                                          | [10]      |
| campherenol                           | CME <sup>c</sup>                                                                          | [10]      |
| hexadecanal                           | CME <sup>c</sup>                                                                          | [10]      |
| linanool                              | CSI <sup>c</sup> , CP <sup>c</sup>                                                        | [11]      |
| 1-phenylethyl mercaptan               | CN <sup>a</sup>                                                                           | [12]      |
| ( <i>E,Z</i> )-2,6- nonadien-1-ol     | CN <sup>a</sup>                                                                           | [12]      |
| 2-methoxy-3-(2-methylpropyl) pyrazine | CN <sup>a</sup>                                                                           | [12]      |
| 4-terpineol                           | CN <sup>a</sup> , CP <sup>a</sup> , CLI <sup>a</sup> , CR <sup>a</sup> , CSI <sup>a</sup> | [12,15]   |
| ( <i>E</i> )-2-decenal                | CN <sup>a</sup> , CD <sup>a</sup>                                                         | [12,14]   |
| ( <i>Z</i> )-5-dodecenal              | CN <sup>a</sup>                                                                           | [12]      |
| ( <i>E,Z</i> )-2,6-dodecadienal       | CN <sup>a</sup>                                                                           | [12]      |



|                        |                                                                         |         |
|------------------------|-------------------------------------------------------------------------|---------|
| (E)-2-dodecenal        | CN <sup>a</sup>                                                         | [12]    |
| $\alpha$ -bergamottene | CLI <sup>a</sup>                                                        | [13]    |
| elemol                 | CD <sup>a</sup> , CN <sup>a</sup> , CR <sup>a</sup> , CSI <sup>a</sup>  | [14,15] |
| $\gamma$ -eudesmol     | CD <sup>a</sup>                                                         | [14]    |
| cosmene                | CP <sup>a</sup>                                                         | [15]    |
| (Z)-p-menth-2-en-1-ol  | CN <sup>a</sup> , CP <sup>a</sup> , CLI <sup>a</sup>                    | [15]    |
| (E)-piperitol          | CSI <sup>a</sup>                                                        | [15]    |
| 8-hydroxylinalool      | CN <sup>a</sup> , CLI <sup>a</sup>                                      | [15]    |
| perillal               | CN <sup>a</sup> , CLI <sup>a</sup> , CR <sup>a</sup> , CSI <sup>a</sup> | [15]    |
| piperitone             | CN <sup>a</sup> , CLI <sup>a</sup>                                      | [15]    |
| methyl geranate        | CN <sup>a</sup> , CLI <sup>a</sup>                                      | [15]    |
| geranyl isobutyrate    | CLI <sup>a</sup>                                                        | [15]    |
| $\alpha$ -guaiene      | CN <sup>a</sup>                                                         | [15]    |
| elixene                | CN <sup>a</sup> , CLI <sup>a</sup> , CR <sup>a</sup> , CSI <sup>a</sup> | [15]    |
| cadalene               | CN <sup>a</sup> , CP <sup>a</sup> , CR <sup>a</sup> , CSI <sup>a</sup>  | [15]    |
| germacrene D-4-ol      | CN <sup>a</sup> , CLI <sup>a</sup> , CR <sup>a</sup> , CSI <sup>a</sup> | [15]    |

a: peel; e: pressed oil; a: juice; e: whole fruit; CAT: *C. aurantium*; CAF: *C. aurantifolia*; CME: *C. medica*; CLI: *C. limon*; CB: *C. bergamia*; CR: *Citrus reticulata*; CK: *C. kinokuni*; CU: *C. unshiu*; CCL: *C. clementina*; CSI: *C. sinensis*; CCLT: *C. Clementine* × *C. tangerine*; CGG: *C. grandis* × *C. grandis*; CP: *C. paradisi*; CN: *C. nobilis*; CD: *C. depressa*.

1. M. Carmen GM, Jose' LR, M. Carmen A, Abelardo G, Antonio G: **Comparative analysis of the volatile fraction of fruit juice from different Citrus species.** *Plos One* 2011, **6**: 1-11.
2. Eirini S, Paschalina C, Kortessa DT, Ioannis T: **Volatile constituents and antioxidant activity of peel, flowers and leaf oils of *Citrus aurantium* L. growing in Greece.** *Molecules* 2013, **18**: 10639-10647.
3. Iness JK, Brahim M: **Characterization of bioactive compounds in Tunisian bitter orange (*Citrus aurantium* L.) peel and juice and determination of their antioxidant activities.** *Biomed Res Int* 2013, **2013**:1-12.
4. Laura E, María S, Susana L, Pilar C, Diego G, Rafael P: **Chemical composition of commercial citrus fruit essential oils and evaluation of their antimicrobial activity acting alone or in combined processes.** *Food Control* 2011, **22**: 896-902.
5. Norio M, Akira F, Kikue K: **Aroma character impact compounds in kinokuni mandarin orange (*Citrus kinokuni*) compared with satsuma mandarin orange (*Citrus unshiu*).** *Biosci Biotechnol Biochem* 2010, **74**: 835-842.

6. Federica M, Rosa T, Marco B, Bruno de C, Monica RL, Filomena C, Giancarlo AS , Roberta M, Ruggero B, Francesco M: **Chemical composition and bioactivity of Citrus medica L. cv. Diamante essential oil obtained by hydrodistillation, cold-pressing and supercritical carbon dioxide extraction.** *Nat Prodt Res* 2011, **25**: 789-799.
7. Antonios M, Dimitrios P, Athanasios K, George K, Athanasios G, Moschos GP: **Citrus essential oils and four enantiomeric pinenes against Culex pipiens (Diptera: Culicidae).** *Parasitol Res* 2009, **105**:769–773.
8. Rosa T, Monica RL, Marco B, Federica M, Vincenzo M, Carmela C, Francesco M: **Comparative study on the antioxidant capacity and cholinesterase inhibitory activity of Citrus aurantifolia Swingle, C. aurantium L., and C. bergamia Risso and Poit. peel essential oils.** *J Food Sci* 2012, **71**: 40-46.
9. A Bermejo, MJ Llosa', A Cano: **Analysis of bioactive compounds in seven Citrus cultivars.** *Food Sci Tech Int* 2011, **17**: 55-58.
10. Bartolo G, Alessia F, Paola D, Rosaria C, Luigi M: **Essential oil composition of Citrus medica L. Cv. Diamante (Diamante citron) determined after using different extraction methods.** *J Sep Sci* 2009, **32**: 99-108.
11. Athanassios G, Dimitrios PP, Athanasios K, George K, Moschos GP, Nickolaos E, Antonios M: **Evaluation of bioefficacy of three Citrus essential oils against the dengue vector Aedes albopictus (Diptera: Culicidae) in correlation to their components enantiomeric distribution.** *Parasitol Res* 2012, **111**: 2253–2263.
12. Jorry D, Stefan K, Praveena S, Martin JL, Philip C: **Evaluation of aroma-active compounds in pontianak orange peel oil (Citrus nobilis Lour. Var. microcarpa Hassk.) by gas chromatography-olfactometry, aroma reconstitution, and omission test.** *J. Agric. Food Chem.* 2009, **57**: 239–244.
13. L Valgimigli, S Gabbanini, E Berliani, E Lucchi, C Beltramini, YL Bertarelli: **Lemon (Citrus limon, Burm.f.) essential oil enhances the trans-epidermal release of lipid- (A, E) and water- (B6, C) soluble vitamins from topical emulsions in reconstructed human epidermis.** *Int J Cosmetic Sci* 2012, **34**: 347–356.

14. Yonathan A, Ikuko T, Sayuri I, Hidekazu S, Masayoshi S, Kensaku T, Koji W: **Volatile aroma components and antioxidant activities of the flavedo peel extract of unripe shiikuwasha (*Citrus depressa* Hayata).** *J Food Sci* 2012, **77**: c469-c475.
15. Cuihua L, Yunjiang C, Hongyan Z, Xiuxin D, Feng C, Juan X: **Volatile constituents of wild Citrus mangshanyegan (*Citrus nobilis* Lauriro) Peel Oil.** *J Agric Food Chem* 2012, **60**: 2617–2628.
